# Supplementary material for: In Vitro and In Vivo Antimicrobial Activity of the Novel Peptide OMN6 against Multidrug-Resistant Acinetobacter baumannii
Source: MDPI journal article supplement (doi:10.3390/antibiotics11091201), 2022-09-05
Supplement: s1 [file s1]

## **TITLE**

**In Vitro and In Vivo Antimicrobial Activity of the Novel Peptide OMN6 against Multidrug-Resistant *Acinetobacter baumannii***

## **AUTHORS**

**Janna Michaeli <sup>1</sup>, Shira Mandel <sup>1</sup>, Shelly Maximov <sup>1</sup>, Jonathan Zazoun <sup>1</sup>, Paola Savoia <sup>2</sup>, Nimmi Kothari <sup>3</sup>, Thomas Valmont <sup>3</sup>, Livia Ferrari <sup>2</sup>, Leonard R. Duncan <sup>4</sup>, Stephen Hawser <sup>3</sup> and Moshe Cohen-Kutner <sup>1</sup> and Niv Bachnoff <sup>1,\*</sup>**

## **AFFILIATIONS**

- 1** Omnix Medical Ltd., High-Tech Village, Givat-Ram Campus, 9270401 Jerusalem, Israel
- 2** Evotec Anti-Infective, Department of Microbiology Discovery, Aptuit (Verona) Srl, an Evotec Company, via A. Fleming 4, 37135 Verona, Italy
- 3** IHMA Europe Sàrl, Route de l'Île-au-Bois 1A, 1870 Monthey, Switzerland
- 4** JMI Laboratories, 345 Beaver Creek Centre, Suite A, North Liberty, IA 52317, USA

**\*** Correspondence: niv@omnixmedical.com



**Table S1. Supplementary information about the resistance pattern of 401 *A. baumannii* clinical isolates used in the Minimal Inhibitory Concentration (MIC) study presented in Table 1.** The resistance phenotype of the different clinical isolates was characterized by broth microdilution method by IHMA Europe Sàrl (Monthey, Switzerland). The study followed the principles and breakpoint values outlined in Clinical and Laboratory Standards Institute (CLSI) and European Committee on Antimicrobial Susceptibility Testing (EUCAST) guidelines. **Green: susceptible isolates. Yellow/Orange: intermediate isolates. Red: resistant isolates.** The resistance pattern is presented according to the following abbreviations: *S* Susceptible, *I* Intermediate, *R* Resistant, *SAM* Ampicillin/Sulbactam (2:1), *FEP* Cefepime, *CAZ* Ceftazidime, *CRO* Ceftriaxone, *COL* Colistin, *GEN* Gentamicin, *LVX* Levofloxacin, *MEM* Meropenem, *TET* Tetracycline, *SXT* Trimethoprim/Sulfamethoxazole (1:19), *N/A* Not available.

|                         |                     |                |              | MIC values (µg/mL)                 |      |                  |             |             |             |            |             |            |            |             |                  |
|-------------------------|---------------------|----------------|--------------|------------------------------------|------|------------------|-------------|-------------|-------------|------------|-------------|------------|------------|-------------|------------------|
|                         |                     |                |              | CLSI Cut-off Values (µg/mL)        | N/A  | S≤4/8<br>R≥16/32 | S≤8<br>R≥32 | S≤8<br>R≥32 | S≤8<br>R≥64 | S≤2<br>R≥8 | S≤4<br>R≥16 | S≤2<br>R≥8 | S≤2<br>R≥8 | S≤4<br>R≥16 | S≤2/38<br>R≥4/76 |
| IHMA Clinical Isolate # | Organism            | Year Collected | Country      | Body Location                      | OMN6 | SAM (2:1)        | FEP         | CAZ         | CRO         | COL        | GEN         | LVX        | MEM        | TET         | TSX (1:19)       |
| 2040459                 | <i>A. baumannii</i> | 2019           | Kenya        | Respiratory: Endotracheal aspirate | 8    | 2                | 2           | 4           | 16          | 0.25       | 0.5         | ≤0.12      | 0.12       | 0.5         | ≤0.06            |
| 2040348                 | <i>A. baumannii</i> | 2019           | Kenya        | Respiratory: Endotracheal aspirate | 8    | 4                | 2           | 4           | 16          | 0.5        | 0.5         | ≤0.12      | 0.12       | 0.5         | 0.12             |
| 1997827                 | <i>A. baumannii</i> | 2019           | Morocco      | Genitourinary: Urine               | 4    | 16               | 32          | 64          | >64         | 0.25       | >16         | 2          | >16        | 4           | 2                |
| 2040416                 | <i>A. baumannii</i> | 2019           | Kenya        | Respiratory: Endotracheal aspirate | 4    | 8                | 8           | >64         | >64         | 0.25       | >16         | 2          | 0.25       | >32         | 4                |
| 2039312                 | <i>A. baumannii</i> | 2019           | Kenya        | Gastrointestinal: Other            | 4    | 16               | 32          | >64         | >64         | 0.25       | >16         | 4          | 16         | >32         | 0.5              |
| 2039379                 | <i>A. baumannii</i> | 2019           | Kenya        | Respiratory: Other                 | 8    | ≤1               | ≤0.25       | 1           | 2           | 0.25       | 0.5         | ≤0.12      | ≤0.06      | 0.25        | 0.25             |
| 2015128                 | <i>A. baumannii</i> | 2019           | South Africa | Bodily Fluids: Peritoneal          | 4    | 8                | 2           | 4           | 16          | 0.25       | >16         | 1          | 8          | 0.5         | 8                |



|                         |                     |                |              | MIC values (µg/mL)                     |      |                  |             |             |             |            |             |            |            |             |                  |
|-------------------------|---------------------|----------------|--------------|----------------------------------------|------|------------------|-------------|-------------|-------------|------------|-------------|------------|------------|-------------|------------------|
|                         |                     |                |              | CLSI Cut-off Values (µg/mL)            | N/A  | S≤4/8<br>R≥16/32 | S≤8<br>R≥32 | S≤8<br>R≥32 | S≤8<br>R≥64 | S≤2<br>R≥8 | S≤4<br>R≥16 | S≤2<br>R≥8 | S≤2<br>R≥8 | S≤4<br>R≥16 | S≤2/38<br>R≥4/76 |
| IHMA Clinical Isolate # | Organism            | Year Collected | Country      | Body Location                          | OMN6 | SAM (2:1)        | FEP         | CAZ         | CRO         | COL        | GEN         | LVX        | MEM        | TET         | TSX (1:19)       |
| 2039416                 | <i>A. baumannii</i> | 2019           | Kenya        | Respiratory:<br>Other                  | 4    | 16               | 32          | 64          | >64         | 0.25       | >16         | 16         | >16        | >32         | >32              |
| 2040243                 | <i>A. baumannii</i> | 2019           | Kenya        | Genitourinary:<br>Urine                | 8    | 32               | >64         | >64         | >64         | 0.25       | >16         | ≤0.12      | 1          | 1           | >32              |
| 1997739                 | <i>A. baumannii</i> | 2019           | Morocco      | Cardiovascular:<br>Blood               | 4    | ≤1               | 1           | 1           | 8           | ≤0.12      | 0.25        | ≤0.12      | 0.25       | 0.5         | 0.12             |
| 2014931                 | <i>A. baumannii</i> | 2019           | South Africa | Respiratory:<br>Sputum                 | 4    | >64              | 1           | 2           | 8           | ≤0.12      | 0.5         | ≤0.12      | ≤0.06      | 0.5         | 0.12             |
| 2039368                 | <i>A. baumannii</i> | 2019           | Kenya        | Respiratory:<br>Sputum                 | 4    | 16               | 32          | >64         | >64         | 0.5        | >16         | 4          | 16         | >32         | 0.5              |
| 2007187                 | <i>A. baumannii</i> | 2019           | Morocco      | Respiratory:<br>Bronchoalveolar lavage | 4    | >64              | >64         | >64         | >64         | ≤0.12      | 0.25        | 4          | >16        | 1           | 4                |
| 2040386                 | <i>A. baumannii</i> | 2019           | Kenya        | Respiratory:<br>Endotracheal aspirate  | 8    | 2                | 2           | 4           | 16          | 0.5        | 0.5         | ≤0.12      | 0.25       | 0.5         | 0.12             |
| 2015016                 | <i>A. baumannii</i> | 2019           | South Africa | Respiratory:<br>Endotracheal aspirate  | 4    | 16               | 16          | 4           | 16          | 0.25       | 0.5         | ≤0.12      | 16         | 0.5         | 0.25             |
| 1997921                 | <i>A. baumannii</i> | 2019           | Morocco      | Respiratory:<br>Other                  | 4    | 2                | 2           | 4           | 16          | 0.25       | 0.25        | ≤0.12      | ≤0.06      | 0.5         | 0.12             |
| 2040420                 | <i>A. baumannii</i> | 2019           | Kenya        | Cardiovascular:<br>Blood               | 4    | 4                | 32          | >64         | >64         | 0.25       | >16         | 2          | 2          | >32         | >32              |
| 2032922                 | <i>A. baumannii</i> | 2019           | South Africa | Respiratory:<br>Endotracheal aspirate  | 4    | ≤1               | 0.5         | 1           | 2           | ≤0.12      | 0.5         | ≤0.12      | ≤0.06      | 0.5         | ≤0.06            |
| 2032966                 | <i>A. baumannii</i> | 2019           | South Africa | Respiratory:<br>Sputum                 | 4    | >64              | >64         | >64         | >64         | 0.25       | >16         | 2          | >16        | >32         | >32              |



|                         |                     |                |              | MIC values (µg/mL)                 |      |                  |             |             |             |            |             |            |            |             |                  |
|-------------------------|---------------------|----------------|--------------|------------------------------------|------|------------------|-------------|-------------|-------------|------------|-------------|------------|------------|-------------|------------------|
|                         |                     |                |              | CLSI Cut-off Values (µg/mL)        | N/A  | S≤4/8<br>R≥16/32 | S≤8<br>R≥32 | S≤8<br>R≥32 | S≤8<br>R≥64 | S≤2<br>R≥8 | S≤4<br>R≥16 | S≤2<br>R≥8 | S≤2<br>R≥8 | S≤4<br>R≥16 | S≤2/38<br>R≥4/76 |
| IHMA Clinical Isolate # | Organism            | Year Collected | Country      | Body Location                      | OMN6 | SAM (2:1)        | FEP         | CAZ         | CRO         | COL        | GEN         | LVX        | MEM        | TET         | TSX (1:19)       |
| 2039270                 | <i>A. baumannii</i> | 2019           | Kenya        | Gastrointestinal: Other            | 4    | >64              | >64         | >64         | >64         | 0.25       | 0.25        | ≤0.12      | >16        | >32         | 0.12             |
| 1966965                 | <i>A. baumannii</i> | 2019           | South Africa | Respiratory: Endotracheal aspirate | 8    | 16               | 64          | >64         | >64         | >8         | >16         | 32         | >16        | >32         | >32              |
| 2040278                 | <i>A. baumannii</i> | 2019           | Kenya        | Genitourinary: Urine               | 4    | 16               | 32          | 64          | >64         | ≤0.12      | 0.25        | 2          | >16        | >32         | 2                |
| 2032963                 | <i>A. baumannii</i> | 2019           | South Africa | Cardiovascular: Blood              | 4    | ≤1               | 1           | 2           | 8           | ≤0.12      | ≤0.12       | ≤0.12      | 0.12       | 0.5         | 0.12             |
| 2034657                 | <i>A. baumannii</i> | 2019           | Tunisia      | Respiratory: Endotracheal aspirate | 4    | 2                | 1           | 4           | 16          | 0.25       | 0.5         | ≤0.12      | 0.25       | 0.5         | 0.12             |
| 2039197                 | <i>A. baumannii</i> | 2019           | Kenya        | Cardiovascular: Blood              | 8    | 32               | 64          | >64         | >64         | 1          | >16         | 4          | >16        | >32         | 16               |
| 2032577                 | <i>A. baumannii</i> | 2019           | South Africa | Cardiovascular: Blood              | 4    | >64              | >64         | >64         | >64         | 0.25       | >16         | 2          | >16        | >32         | >32              |
| 2013283                 | <i>A. baumannii</i> | 2019           | Tunisia      | Respiratory: Endotracheal aspirate | 8    | 64               | >64         | >64         | >64         | 0.25       | >16         | 8          | >16        | >32         | 1                |
| 1997743                 | <i>A. baumannii</i> | 2019           | Morocco      | Cardiovascular: Blood              | 4    | 2                | 2           | 4           | 32          | 0.25       | 0.5         | ≤0.12      | ≤0.06      | 0.5         | ≤0.06            |
| 2032730                 | <i>A. baumannii</i> | 2019           | South Africa | Respiratory: Sputum                | 8    | 32               | 32          | >64         | >64         | 0.5        | >16         | 4          | >16        | >32         | 8                |
| 1997983                 | <i>A. baumannii</i> | 2019           | Morocco      | Respiratory: Other                 | 4    | 16               | 32          | >64         | >64         | 0.25       | >16         | 8          | >16        | 4           | 16               |
| 2013248                 | <i>A. baumannii</i> | 2019           | Tunisia      | Respiratory: Endotracheal aspirate | 4    | 32               | 32          | 32          | >64         | 0.25       | >16         | 8          | >16        | 8           | >32              |



|                         |                     |                |              | MIC values (µg/mL)                  |      |                  |             |             |             |            |             |            |            |             |                  |
|-------------------------|---------------------|----------------|--------------|-------------------------------------|------|------------------|-------------|-------------|-------------|------------|-------------|------------|------------|-------------|------------------|
|                         |                     |                |              | CLSI Cut-off Values (µg/mL)         | N/A  | S≤4/8<br>R≥16/32 | S≤8<br>R≥32 | S≤8<br>R≥32 | S≤8<br>R≥64 | S≤2<br>R≥8 | S≤4<br>R≥16 | S≤2<br>R≥8 | S≤2<br>R≥8 | S≤4<br>R≥16 | S≤2/38<br>R≥4/76 |
| IHMA Clinical Isolate # | Organism            | Year Collected | Country      | Body Location                       | OMN6 | SAM (2:1)        | FEP         | CAZ         | CRO         | COL        | GEN         | LVX        | MEM        | TET         | TSX (1:19)       |
| 2007234                 | <i>A. baumannii</i> | 2019           | Morocco      | Respiratory: Bronchoalveolar lavage | 8    | 16               | 32          | 64          | >64         | 0.25       | 0.25        | 1          | 16         | 32          | 0.25             |
| 1997910                 | <i>A. baumannii</i> | 2019           | Morocco      | Respiratory: Other                  | 4    | >64              | >64         | >64         | >64         | 0.25       | >16         | 4          | >16        | 2           | 0.12             |
| 2007306                 | <i>A. baumannii</i> | 2019           | Morocco      | Respiratory: Bronchoalveolar lavage | 4    | 32               | 32          | 64          | >64         | 0.25       | 16          | 4          | 16         | >32         | >32              |
| 2007119                 | <i>A. baumannii</i> | 2019           | Morocco      | Genitourinary: Urine                | 4    | 32               | 32          | 32          | >64         | 0.25       | >16         | 4          | 16         | 4           | 32               |
| 2007176                 | <i>A. baumannii</i> | 2019           | Morocco      | Respiratory: Bronchoalveolar lavage | 8    | 64               | 32          | >64         | >64         | 8          | >16         | 16         | 16         | >32         | 32               |
| 2014712                 | <i>A. baumannii</i> | 2019           | South Africa | Genitourinary: Urine                | 4    | 8                | 8           | 4           | 16          | ≤0.12      | 16          | 4          | 16         | >32         | 8                |
| 2007305                 | <i>A. baumannii</i> | 2019           | Morocco      | Respiratory: Bronchoalveolar lavage | 4    | 32               | 32          | 64          | >64         | 0.25       | >16         | 2          | >16        | >32         | 32               |
| 2007304                 | <i>A. baumannii</i> | 2019           | Morocco      | Respiratory: Bronchoalveolar lavage | 4    | 16               | 32          | 64          | >64         | 0.25       | 2           | 8          | >16        | >32         | >32              |
| 2007242                 | <i>A. baumannii</i> | 2019           | Morocco      | Respiratory: Bronchoalveolar lavage | 4    | 8                | 16          | >64         | >64         | 0.25       | 4           | 4          | 16         | 4           | 0.25             |
| 2015096                 | <i>A. baumannii</i> | 2019           | South Africa | Bodily Fluids: Peritoneal           | 4    | 8                | 8           | 2           | 16          | ≤0.12      | 0.5         | ≤0.12      | 8          | 0.25        | 0.12             |
| 2032588                 | <i>A. baumannii</i> | 2019           | South Africa | Cardiovascular: Blood               | 8    | 2                | 1           | 4           | 16          | 0.25       | 0.5         | ≤0.12      | 0.12       | 0.5         | 0.12             |



|                         |                     |                |              | MIC values (µg/mL)                 |      |                  |             |             |             |            |             |            |            |             |                  |
|-------------------------|---------------------|----------------|--------------|------------------------------------|------|------------------|-------------|-------------|-------------|------------|-------------|------------|------------|-------------|------------------|
|                         |                     |                |              | CLSI Cut-off Values (µg/mL)        | N/A  | S≤4/8<br>R≥16/32 | S≤8<br>R≥32 | S≤8<br>R≥32 | S≤8<br>R≥64 | S≤2<br>R≥8 | S≤4<br>R≥16 | S≤2<br>R≥8 | S≤2<br>R≥8 | S≤4<br>R≥16 | S≤2/38<br>R≥4/76 |
| IHMA Clinical Isolate # | Organism            | Year Collected | Country      | Body Location                      | OMN6 | SAM (2:1)        | FEP         | CAZ         | CRO         | COL        | GEN         | LVX        | MEM        | TET         | TSX (1:19)       |
| 2013258                 | <i>A. baumannii</i> | 2019           | Tunisia      | Respiratory: Endotracheal aspirate | 4    | 32               | 32          | 32          | >64         | 0.25       | >16         | 8          | >16        | 8           | >32              |
| 2034667                 | <i>A. baumannii</i> | 2019           | Tunisia      | Respiratory: Endotracheal aspirate | 4    | 32               | 64          | >64         | >64         | ≤0.12      | 0.5         | 2          | >16        | >32         | ≤0.06            |
| 2034594                 | <i>A. baumannii</i> | 2019           | Tunisia      | Respiratory: Endotracheal aspirate | 4    | 16               | 64          | >64         | >64         | 0.25       | >16         | >32        | 16         | >32         | 1                |
| 2013240                 | <i>A. baumannii</i> | 2019           | Tunisia      | Respiratory: Endotracheal aspirate | 4    | 8                | 32          | >64         | >64         | 0.25       | 0.5         | 1          | 16         | 0.5         | ≤0.06            |
| 2032673                 | <i>A. baumannii</i> | 2019           | South Africa | Respiratory: Endotracheal aspirate | 4    | 16               | 16          | 4           | 16          | 0.25       | 1           | ≤0.12      | 16         | 1           | 0.12             |
| 2100758                 | <i>A. baumannii</i> | 2019           | Japan        | Genitourinary: Urine               | 4    | ≤1               | 0.5         | 1           | 2           | 0.25       | 0.5         | ≤0.12      | ≤0.06      | 0.25        | 0.12             |
| 1966920                 | <i>A. baumannii</i> | 2019           | South Africa | Genitourinary: Urine               | 4    | 16               | 32          | 64          | >64         | 0.25       | 2           | 4          | >16        | >32         | >32              |
| 2100740                 | <i>A. baumannii</i> | 2019           | Japan        | Genitourinary: Urine               | 4    | ≤1               | 0.5         | 1           | 4           | 0.25       | 0.5         | ≤0.12      | 0.12       | 0.25        | 0.12             |
| 2034598                 | <i>A. baumannii</i> | 2019           | Tunisia      | Respiratory: Endotracheal aspirate | 4    | >64              | >64         | >64         | >64         | ≤0.12      | >16         | 2          | >16        | 2           | 8                |
| 2038542                 | <i>A. baumannii</i> | 2019           | Korea, South | Respiratory: Sputum                | 4    | 16               | 32          | 64          | >64         | 0.25       | >16         | 2          | >16        | >32         | 32               |
| 2032729                 | <i>A. baumannii</i> | 2019           | South Africa | Respiratory: Endotracheal aspirate | 4    | 2                | 2           | 4           | 16          | 0.25       | 0.5         | ≤0.12      | 0.12       | 0.5         | 0.12             |



|                         |                     |                |              | MIC values (µg/mL)                  |      |                  |             |             |             |            |             |            |            |             |                  |
|-------------------------|---------------------|----------------|--------------|-------------------------------------|------|------------------|-------------|-------------|-------------|------------|-------------|------------|------------|-------------|------------------|
|                         |                     |                |              | CLSI Cut-off Values (µg/mL)         | N/A  | S≤4/8<br>R≥16/32 | S≤8<br>R≥32 | S≤8<br>R≥32 | S≤8<br>R≥64 | S≤2<br>R≥8 | S≤4<br>R≥16 | S≤2<br>R≥8 | S≤2<br>R≥8 | S≤4<br>R≥16 | S≤2/38<br>R≥4/76 |
| IHMA Clinical Isolate # | Organism            | Year Collected | Country      | Body Location                       | OMN6 | SAM (2:1)        | FEP         | CAZ         | CRO         | COL        | GEN         | LVX        | MEM        | TET         | TSX (1:19)       |
| 2013284                 | <i>A. baumannii</i> | 2019           | Tunisia      | Respiratory: Endotracheal aspirate  | 4    | 16               | 64          | 32          | >64         | 0.25       | 16          | 2          | >16        | 4           | 8                |
| 2034561                 | <i>A. baumannii</i> | 2019           | Tunisia      | Cardiovascular: Blood               | 4    | >64              | >64         | >64         | >64         | 0.25       | >16         | 4          | >16        | >32         | 0.5              |
| 1990182                 | <i>A. baumannii</i> | 2019           | Korea, South | Respiratory: Bronchoalveolar lavage | 8    | 16               | 32          | >64         | >64         | 0.25       | >16         | 8          | >16        | 4           | 16               |
| 1966954                 | <i>A. baumannii</i> | 2019           | South Africa | Respiratory: Sputum                 | 4    | >64              | >64         | >64         | >64         | >8         | >16         | 2          | >16        | 16          | >32              |
| 2013290                 | <i>A. baumannii</i> | 2019           | Tunisia      | Respiratory: Endotracheal aspirate  | 8    | 64               | 64          | >64         | >64         | 0.25       | >16         | 16         | >16        | >32         | 2                |
| 2034602                 | <i>A. baumannii</i> | 2019           | Tunisia      | Respiratory: Endotracheal aspirate  | 4    | 8                | 16          | 32          | >64         | 0.25       | >16         | 16         | 16         | >32         | 32               |
| 2034368                 | <i>A. baumannii</i> | 2019           | Taiwan       | Gastrointestinal: Gall Bladder      | 4    | ≤1               | 1           | 2           | 8           | 0.25       | 0.5         | ≤0.12      | 0.12       | 0.25        | 0.12             |
| 2015116                 | <i>A. baumannii</i> | 2019           | South Africa | Bodily Fluids: Peritoneal           | 4    | 16               | 16          | 4           | 16          | 0.25       | 0.5         | ≤0.12      | 16         | 0.5         | 0.12             |
| 1995938                 | <i>A. baumannii</i> | 2019           | Japan        | Gastrointestinal: Gall Bladder      | 4    | ≤1               | 1           | 1           | 2           | ≤0.12      | 0.25        | ≤0.12      | ≤0.06      | 0.25        | ≤0.06            |
| 2032693                 | <i>A. baumannii</i> | 2019           | South Africa | Respiratory: Endotracheal aspirate  | 8    | 16               | 32          | 32          | >64         | 0.25       | 2           | 4          | 16         | >32         | >32              |
| 2033023                 | <i>A. baumannii</i> | 2019           | South Africa | Respiratory: Sputum                 | 4    | 32               | 64          | >64         | >64         | ≤0.12      | >16         | 16         | >16        | >32         | >32              |
| 2074737                 | <i>A. baumannii</i> | 2019           | Malaysia     | Bodily Fluids: Peritoneal           | 4    | >64              | 16          | >64         | >64         | 0.25       | >16         | 2          | 1          | >32         | 0.5              |



|                         |                     |                |              | MIC values (µg/mL)                 |      |                  |             |             |             |            |             |            |            |             |                  |
|-------------------------|---------------------|----------------|--------------|------------------------------------|------|------------------|-------------|-------------|-------------|------------|-------------|------------|------------|-------------|------------------|
|                         |                     |                |              | CLSI Cut-off Values (µg/mL)        | N/A  | S≤4/8<br>R≥16/32 | S≤8<br>R≥32 | S≤8<br>R≥32 | S≤8<br>R≥64 | S≤2<br>R≥8 | S≤4<br>R≥16 | S≤2<br>R≥8 | S≤2<br>R≥8 | S≤4<br>R≥16 | S≤2/38<br>R≥4/76 |
| IHMA Clinical Isolate # | Organism            | Year Collected | Country      | Body Location                      | OMN6 | SAM (2:1)        | FEP         | CAZ         | CRO         | COL        | GEN         | LVX        | MEM        | TET         | TSX (1:19)       |
| 2058689                 | <i>A. baumannii</i> | 2019           | Taiwan       | Respiratory: Sputum                | 8    | ≤1               | 1           | 2           | 16          | 0.25       | 0.5         | ≤0.12      | ≤0.06      | 0.25        | ≤0.06            |
| 2013202                 | <i>A. baumannii</i> | 2019           | Tunisia      | Cardiovascular: Blood              | 4    | 32               | 32          | >64         | >64         | 0.25       | >16         | 4          | >16        | 8           | >32              |
| 2136953                 | <i>A. baumannii</i> | 2019           | Thailand     | Gastrointestinal: Gall Bladder     | 4    | 16               | 16          | 64          | >64         | 0.25       | >16         | 2          | 16         | 2           | 8                |
| 2034597                 | <i>A. baumannii</i> | 2019           | Tunisia      | Respiratory: Endotracheal aspirate | 4    | 32               | 64          | >64         | >64         | 0.25       | >16         | 2          | >16        | >32         | 0.5              |
| 1985098                 | <i>A. baumannii</i> | 2019           | Thailand     | Respiratory: Sputum                | 4    | 64               | 64          | >64         | >64         | 0.25       | >16         | 2          | >16        | >32         | 32               |
| 2046641                 | <i>A. baumannii</i> | 2019           | Taiwan       | Respiratory: Endotracheal aspirate | 4    | 2                | 1           | 2           | 8           | ≤0.12      | 0.5         | ≤0.12      | 0.12       | 0.5         | 0.12             |
| 1993482                 | <i>A. baumannii</i> | 2019           | Thailand     | Gastrointestinal: Gall Bladder     | 4    | 64               | 64          | >64         | >64         | 0.25       | >16         | 8          | >16        | >32         | >32              |
| 1985099                 | <i>A. baumannii</i> | 2019           | Thailand     | Respiratory: Sputum                | 4    | >64              | >64         | >64         | >64         | 0.25       | >16         | 2          | >16        | >32         | 32               |
| 2008218                 | <i>A. baumannii</i> | 2019           | Belgium      | Cardiovascular: Blood              | 4    | ≤1               | 1           | 2           | 8           | 0.25       | 0.25        | ≤0.12      | 0.12       | 0.5         | 0.12             |
| 1987077                 | <i>A. baumannii</i> | 2019           | Croatia      | Cardiovascular: Blood              | 8    | 16               | 16          | >64         | >64         | 0.25       | 2           | 2          | >16        | >32         | 32               |
| 1970291                 | <i>A. baumannii</i> | 2019           | Korea, South | Genitourinary: Urine               | 8    | 64               | 64          | 64          | >64         | 0.25       | >16         | 8          | >16        | 2           | 32               |
| 2020550                 | <i>A. baumannii</i> | 2019           | Croatia      | Respiratory: Endotracheal aspirate | 4    | 16               | 16          | 64          | >64         | 0.25       | >16         | 2          | >16        | >32         | >32              |
| 2058692                 | <i>A. baumannii</i> | 2019           | Taiwan       | Respiratory: Sputum                | 4    | 64               | 64          | 16          | >64         | 0.25       | >16         | 32         | 16         | >32         | >32              |



|                         |                     |                |              | MIC values (µg/mL)                  |      |                  |             |             |             |            |             |            |            |             |                  |
|-------------------------|---------------------|----------------|--------------|-------------------------------------|------|------------------|-------------|-------------|-------------|------------|-------------|------------|------------|-------------|------------------|
|                         |                     |                |              | CLSI Cut-off Values (µg/mL)         | N/A  | S≤4/8<br>R≥16/32 | S≤8<br>R≥32 | S≤8<br>R≥32 | S≤8<br>R≥64 | S≤2<br>R≥8 | S≤4<br>R≥16 | S≤2<br>R≥8 | S≤2<br>R≥8 | S≤4<br>R≥16 | S≤2/38<br>R≥4/76 |
| IHMA Clinical Isolate # | Organism            | Year Collected | Country      | Body Location                       | OMN6 | SAM (2:1)        | FEP         | CAZ         | CRO         | COL        | GEN         | LVX        | MEM        | TET         | TSX (1:19)       |
| 2038537                 | <i>A. baumannii</i> | 2019           | Korea, South | Respiratory: Bronchoalveolar lavage | 4    | 8                | 16          | 64          | >64         | 0.25       | >16         | 16         | 16         | 2           | 8                |
| 1987181                 | <i>A. baumannii</i> | 2019           | Croatia      | Respiratory: Endotracheal aspirate  | 8    | 64               | 64          | >64         | >64         | 1          | >16         | 2          | >16        | >32         | 1                |
| 2007738                 | <i>A. baumannii</i> | 2019           | Thailand     | Gastrointestinal: Gall Bladder      | 4    | >64              | >64         | >64         | >64         | 0.25       | >16         | 16         | >16        | >32         | >32              |
| 1987202                 | <i>A. baumannii</i> | 2019           | Croatia      | Respiratory: Endotracheal aspirate  | 4    | 16               | 32          | >64         | >64         | 0.25       | >16         | 8          | >16        | >32         | 2                |
| 1984211                 | <i>A. baumannii</i> | 2019           | Korea, South | Respiratory: Sputum                 | 4    | 32               | 64          | >64         | >64         | 0.25       | >16         | 8          | >16        | 4           | 16               |
| 1990247                 | <i>A. baumannii</i> | 2019           | Korea, South | Respiratory: Sputum                 | 4    | 32               | 32          | >64         | >64         | ≤0.12      | 1           | 2          | 16         | 2           | 32               |
| 1970277                 | <i>A. baumannii</i> | 2019           | Korea, South | Genitourinary: Urine                | 8    | 32               | 64          | 64          | >64         | 0.25       | >16         | 8          | >16        | 4           | 16               |
| 2046756                 | <i>A. baumannii</i> | 2019           | Taiwan       | Gastrointestinal: Gall Bladder      | 4    | 8                | 8           | 64          | >64         | 0.25       | >16         | 32         | 8          | >32         | 4                |
| 2037902                 | <i>A. baumannii</i> | 2019           | Thailand     | Respiratory: Sputum                 | 4    | 8                | 16          | 32          | >64         | 0.25       | >16         | 2          | 8          | >32         | 16               |
| 1993544                 | <i>A. baumannii</i> | 2019           | Thailand     | Genitourinary: Urine                | 4    | 8                | 32          | >64         | >64         | ≤0.12      | 0.25        | 2          | 8          | 0.5         | ≤0.06            |
| 1985097                 | <i>A. baumannii</i> | 2019           | Thailand     | Respiratory: Endotracheal aspirate  | 4    | ≤1               | 1           | 2           | 16          | ≤0.12      | 0.25        | ≤0.12      | 0.12       | 1           | 0.12             |
| 1999178                 | <i>A. baumannii</i> | 2019           | Belgium      | Cardiovascular: Blood               | 4    | ≤1               | 1           | 2           | 8           | 0.25       | 0.5         | ≤0.12      | 0.12       | 0.25        | ≤0.06            |



|                         |                     |                |                | MIC values (µg/mL)                 |      |                  |             |             |             |            |             |            |            |             |                  |
|-------------------------|---------------------|----------------|----------------|------------------------------------|------|------------------|-------------|-------------|-------------|------------|-------------|------------|------------|-------------|------------------|
|                         |                     |                |                | CLSI Cut-off Values (µg/mL)        | N/A  | S≤4/8<br>R≥16/32 | S≤8<br>R≥32 | S≤8<br>R≥32 | S≤8<br>R≥64 | S≤2<br>R≥8 | S≤4<br>R≥16 | S≤2<br>R≥8 | S≤2<br>R≥8 | S≤4<br>R≥16 | S≤2/38<br>R≥4/76 |
| IHMA Clinical Isolate # | Organism            | Year Collected | Country        | Body Location                      | OMN6 | SAM (2:1)        | FEP         | CAZ         | CRO         | COL        | GEN         | LVX        | MEM        | TET         | TSX (1:19)       |
| 1993545                 | <i>A. baumannii</i> | 2019           | Thailand       | Genitourinary: Urine               | 4    | 64               | >64         | >64         | >64         | ≤0.12      | >16         | 4          | 16         | >32         | >32              |
| 2008178                 | <i>A. baumannii</i> | 2019           | Belgium        | Genitourinary: Urine               | 4    | >64              | >64         | >64         | >64         | 0.25       | >16         | 8          | >16        | >32         | 32               |
| 1957635                 | <i>A. baumannii</i> | 2019           | Thailand       | Respiratory: Sputum                | 4    | 16               | 32          | >64         | >64         | ≤0.12      | 0.25        | 2          | 16         | >32         | ≤0.06            |
| 1995202                 | <i>A. baumannii</i> | 2019           | Czech Republic | Respiratory: Sputum                | 4    | ≤1               | 0.5         | 1           | 2           | 0.25       | 0.5         | ≤0.12      | ≤0.06      | 0.25        | 0.12             |
| 1987190                 | <i>A. baumannii</i> | 2019           | Croatia        | Respiratory: Endotracheal aspirate | 4    | 64               | 64          | >64         | >64         | 0.5        | >16         | 4          | >16        | >32         | 1                |
| 2020393                 | <i>A. baumannii</i> | 2019           | Croatia        | Respiratory: Other                 | 8    | 32               | 64          | >64         | >64         | 0.25       | >16         | 8          | >16        | >32         | >32              |
| 2007739                 | <i>A. baumannii</i> | 2019           | Thailand       | Gastrointestinal: Gall Bladder     | 4    | 2                | 1           | 2           | 8           | 0.25       | 0.5         | ≤0.12      | 8          | 0.5         | 0.12             |
| 2020344                 | <i>A. baumannii</i> | 2019           | Croatia        | Respiratory: Endotracheal aspirate | 4    | 64               | 64          | >64         | >64         | 0.25       | >16         | 2          | >16        | >32         | 8                |
| 1957634                 | <i>A. baumannii</i> | 2019           | Thailand       | Respiratory: Sputum                | 4    | 16               | 64          | >64         | >64         | ≤0.12      | 0.5         | 1          | 16         | >32         | ≤0.06            |
| 1995229                 | <i>A. baumannii</i> | 2019           | Czech Republic | Respiratory: Sputum                | 4    | 32               | 64          | >64         | >64         | 0.25       | >16         | 8          | >16        | >32         | >32              |
| 1957646                 | <i>A. baumannii</i> | 2019           | Thailand       | Genitourinary: Urine               | 4    | 16               | 16          | 64          | >64         | 0.5        | >16         | 2          | >16        | >32         | 16               |
| 1987171                 | <i>A. baumannii</i> | 2019           | Croatia        | Respiratory: Sputum                | 4    | 32               | 64          | >64         | >64         | 1          | >16         | 2          | >16        | >32         | 1                |
| 2031463                 | <i>A. baumannii</i> | 2019           | Greece         | Cardiovascular: Blood              | 4    | 64               | >64         | >64         | >64         | 2          | >16         | 4          | >16        | >32         | 32               |



|                         |                     |                |                | MIC values (µg/mL)                 |      |                  |             |             |             |            |             |            |            |             |                  |
|-------------------------|---------------------|----------------|----------------|------------------------------------|------|------------------|-------------|-------------|-------------|------------|-------------|------------|------------|-------------|------------------|
|                         |                     |                |                | CLSI Cut-off Values (µg/mL)        | N/A  | S≤4/8<br>R≥16/32 | S≤8<br>R≥32 | S≤8<br>R≥32 | S≤8<br>R≥64 | S≤2<br>R≥8 | S≤4<br>R≥16 | S≤2<br>R≥8 | S≤2<br>R≥8 | S≤4<br>R≥16 | S≤2/38<br>R≥4/76 |
| IHMA Clinical Isolate # | Organism            | Year Collected | Country        | Body Location                      | OMN6 | SAM (2:1)        | FEP         | CAZ         | CRO         | COL        | GEN         | LVX        | MEM        | TET         | TSX (1:19)       |
| 1957655                 | <i>A. baumannii</i> | 2019           | Thailand       | Genitourinary: Urine               | 4    | 32               | >64         | >64         | >64         | ≤0.12      | 0.5         | 2          | 16         | 16          | ≤0.06            |
| 2065587                 | <i>A. baumannii</i> | 2019           | France         | Genitourinary: Urine               | 4    | ≤1               | 1           | 2           | 8           | 0.25       | 0.25        | ≤0.12      | 0.12       | 0.5         | 0.12             |
| 1989553                 | <i>A. baumannii</i> | 2019           | Germany        | Respiratory: Endotracheal aspirate | 4    | ≤1               | 0.5         | 0.5         | 4           | 0.25       | 0.5         | ≤0.12      | 0.12       | 0.5         | 0.25             |
| 1989607                 | <i>A. baumannii</i> | 2019           | Germany        | Respiratory: Endotracheal aspirate | 4    | ≤1               | 0.5         | 2           | 8           | 0.25       | 0.5         | ≤0.12      | ≤0.06      | 0.25        | ≤0.06            |
| 1995161                 | <i>A. baumannii</i> | 2019           | Czech Republic | Genitourinary: Kidneys             | 4    | ≤1               | 1           | 2           | 8           | 0.25       | 0.5         | ≤0.12      | 0.12       | 0.5         | 0.25             |
| 2065297                 | <i>A. baumannii</i> | 2019           | Germany        | Respiratory: Bronchial brushing    | 4    | 4                | 8           | 16          | >64         | ≤0.12      | 2           | 8          | 0.5        | >32         | 1                |
| 1983239                 | <i>A. baumannii</i> | 2019           | Greece         | Respiratory: Endotracheal aspirate | 8    | 32               | 64          | >64         | >64         | >8         | >16         | 4          | >16        | 2           | 32               |
| 1974367                 | <i>A. baumannii</i> | 2019           | Germany        | Genitourinary: Urinary Bladder     | 4    | 2                | 2           | 4           | 16          | 0.25       | 0.5         | ≤0.12      | 0.12       | 0.5         | 0.12             |
| 2039091                 | <i>A. baumannii</i> | 2019           | Hungary        | Cardiovascular: Blood              | 8    | 64               | 16          | >64         | >64         | 0.25       | >16         | 16         | 8          | 4           | 32               |
| 1993543                 | <i>A. baumannii</i> | 2019           | Thailand       | Genitourinary: Urine               | 4    | 64               | 64          | >64         | >64         | 0.25       | >16         | 2          | >16        | >32         | 0.5              |
| 2038976                 | <i>A. baumannii</i> | 2019           | Hungary        | Bodily Fluids: Peritoneal          | 4    | 32               | 32          | >64         | >64         | 0.25       | >16         | 8          | >16        | >32         | >32              |
| 2078200                 | <i>A. baumannii</i> | 2019           | Italy          | Cardiovascular: Blood              | 4    | 32               | 32          | 64          | >64         | 0.25       | >16         | 32         | >16        | >32         | >32              |



|                         |                     |                |         | MIC values (µg/mL)                  |      |                  |             |             |             |            |             |            |            |             |                  |
|-------------------------|---------------------|----------------|---------|-------------------------------------|------|------------------|-------------|-------------|-------------|------------|-------------|------------|------------|-------------|------------------|
|                         |                     |                |         | CLSI Cut-off Values (µg/mL)         | N/A  | S≤4/8<br>R≥16/32 | S≤8<br>R≥32 | S≤8<br>R≥32 | S≤8<br>R≥64 | S≤2<br>R≥8 | S≤4<br>R≥16 | S≤2<br>R≥8 | S≤2<br>R≥8 | S≤4<br>R≥16 | S≤2/38<br>R≥4/76 |
| IHMA Clinical Isolate # | Organism            | Year Collected | Country | Body Location                       | OMN6 | SAM (2:1)        | FEP         | CAZ         | CRO         | COL        | GEN         | LVX        | MEM        | TET         | TSX (1:19)       |
| 1987198                 | <i>A. baumannii</i> | 2019           | Croatia | Respiratory: Endotracheal aspirate  | 8    | 32               | 64          | 64          | >64         | 0.5        | >16         | 4          | >16        | >32         | 32               |
| 2118994                 | <i>A. baumannii</i> | 2019           | France  | Gastrointestinal: Other             | 4    | ≤1               | 1           | 2           | 8           | ≤0.12      | 0.5         | ≤0.12      | 0.12       | 0.25        | ≤0.06            |
| 1987189                 | <i>A. baumannii</i> | 2019           | Croatia | Respiratory: Endotracheal aspirate  | 8    | 32               | 64          | >64         | >64         | 0.5        | >16         | 4          | >16        | >32         | 1                |
| 2020464                 | <i>A. baumannii</i> | 2019           | Croatia | Cardiovascular: Blood               | 4    | 32               | 16          | >64         | >64         | 0.25       | >16         | 2          | >16        | 4           | 2                |
| 2020542                 | <i>A. baumannii</i> | 2019           | Croatia | Respiratory: Endotracheal aspirate  | 8    | 8                | 4           | >64         | >64         | ≤0.12      | >16         | 1          | >16        | 0.5         | 0.5              |
| 2065104                 | <i>A. baumannii</i> | 2019           | Germany | Gastrointestinal: Other             | 4    | 8                | 16          | 4           | 16          | 0.25       | >16         | 2          | 16         | 32          | 8                |
| 2020348                 | <i>A. baumannii</i> | 2019           | Croatia | Respiratory: Other                  | 8    | 32               | 64          | >64         | >64         | 0.25       | >16         | 8          | >16        | >32         | >32              |
| 1983237                 | <i>A. baumannii</i> | 2019           | Greece  | Respiratory: Bronchoalveolar lavage | 4    | 64               | >64         | >64         | >64         | 2          | >16         | 4          | >16        | 2           | 32               |
| 2031462                 | <i>A. baumannii</i> | 2019           | Greece  | Cardiovascular: Blood               | 8    | 16               | >64         | >64         | >64         | 0.25       | >16         | 8          | 16         | >32         | >32              |
| 1971733                 | <i>A. baumannii</i> | 2019           | Latvia  | Gastrointestinal: Pancreas          | 4    | 64               | 64          | >64         | >64         | 0.25       | >16         | 8          | >16        | >32         | 16               |
| 1983241                 | <i>A. baumannii</i> | 2019           | Greece  | Cardiovascular: Blood               | 4    | 32               | 64          | >64         | >64         | 1          | >16         | 4          | >16        | >32         | >32              |
| 1971752                 | <i>A. baumannii</i> | 2019           | Latvia  | Gastrointestinal: Pancreas          | 4    | 64               | 32          | >64         | >64         | 0.25       | >16         | 8          | >16        | >32         | 32               |



|                               |                     |                   |         | MIC values (µg/mL)                        |      |                  |             |             |             |            |             |            |            |             |                  |
|-------------------------------|---------------------|-------------------|---------|-------------------------------------------|------|------------------|-------------|-------------|-------------|------------|-------------|------------|------------|-------------|------------------|
|                               |                     |                   |         | CLSI Cut-off<br>Values (µg/mL)            | N/A  | S≤4/8<br>R≥16/32 | S≤8<br>R≥32 | S≤8<br>R≥32 | S≤8<br>R≥64 | S≤2<br>R≥8 | S≤4<br>R≥16 | S≤2<br>R≥8 | S≤2<br>R≥8 | S≤4<br>R≥16 | S≤2/38<br>R≥4/76 |
| IHMA<br>Clinical<br>Isolate # | Organism            | Year<br>Collected | Country | Body Location                             | OMN6 | SAM<br>(2:1)     | FEP         | CAZ         | CRO         | COL        | GEN         | LVX        | MEM        | TET         | TSX<br>(1:19)    |
| 2031524                       | <i>A. baumannii</i> | 2019              | Greece  | Genitourinary:<br>Urine                   | 4    | 64               | >64         | >64         | 64          | 0.25       | >16         | 2          | >16        | >32         | 16               |
| 2020360                       | <i>A. baumannii</i> | 2019              | Croatia | Respiratory:<br>Other                     | 8    | 16               | 32          | >64         | >64         | 0.25       | >16         | 8          | 16         | >32         | 32               |
| 2031416                       | <i>A. baumannii</i> | 2019              | Greece  | Cardiovascular:<br>Blood                  | 8    | 32               | 64          | >64         | >64         | 0.25       | 16          | 4          | >16        | >32         | >32              |
| 2020358                       | <i>A. baumannii</i> | 2019              | Croatia | Respiratory:<br>Other                     | 4    | 64               | 16          | >64         | >64         | 0.25       | >16         | 2          | >16        | 2           | 4                |
| 2031441                       | <i>A. baumannii</i> | 2019              | Greece  | Cardiovascular:<br>Blood                  | 8    | 64               | 64          | >64         | >64         | 0.5        | >16         | 32         | >16        | >32         | 1                |
| 2031511                       | <i>A. baumannii</i> | 2019              | Greece  | Genitourinary:<br>Urine                   | 4    | ≤1               | 0.5         | 2           | 8           | 0.25       | 0.25        | ≤0.12      | ≤0.06      | 0.25        | ≤0.06            |
| 1983235                       | <i>A. baumannii</i> | 2019              | Greece  | Respiratory:<br>Sputum                    | 8    | 32               | 64          | >64         | >64         | 1          | >16         | 4          | >16        | 4           | 32               |
| 1971673                       | <i>A. baumannii</i> | 2019              | Latvia  | Respiratory:<br>Endotracheal<br>aspirate  | 4    | 64               | 64          | >64         | >64         | 0.25       | >16         | 8          | >16        | >32         | >32              |
| 1983243                       | <i>A. baumannii</i> | 2019              | Greece  | Respiratory:<br>Endotracheal<br>aspirate  | 4    | 64               | >64         | >64         | >64         | 0.5        | >16         | 8          | >16        | >32         | >32              |
| 2119058                       | <i>A. baumannii</i> | 2019              | Germany | Gastrointestinal:<br>Large Colon          | 8    | ≤1               | 1           | 2           | 8           | 0.25       | 0.5         | ≤0.12      | 0.12       | 0.25        | 0.12             |
| 1954162                       | <i>A. baumannii</i> | 2019              | Germany | Gastrointestinal:<br>Small Colon          | 4    | 2                | 1           | 2           | 8           | 0.25       | 0.5         | ≤0.12      | 0.12       | 0.25        | 0.12             |
| 1983230                       | <i>A. baumannii</i> | 2019              | Greece  | Respiratory:<br>Sputum                    | 8    | 32               | 32          | >64         | >64         | 0.5        | >16         | 4          | >16        | >32         | >32              |
| 1971821                       | <i>A. baumannii</i> | 2019              | Latvia  | Respiratory:<br>Bronchoalveolar<br>lavage | 8    | 64               | >64         | >64         | >64         | 0.25       | >16         | 2          | >16        | 0.5         | 4                |



|                         |                     |                |           | MIC values (µg/mL)                     |      |                  |             |             |             |            |             |            |            |             |                  |
|-------------------------|---------------------|----------------|-----------|----------------------------------------|------|------------------|-------------|-------------|-------------|------------|-------------|------------|------------|-------------|------------------|
|                         |                     |                |           | CLSI Cut-off Values (µg/mL)            | N/A  | S≤4/8<br>R≥16/32 | S≤8<br>R≥32 | S≤8<br>R≥32 | S≤8<br>R≥64 | S≤2<br>R≥8 | S≤4<br>R≥16 | S≤2<br>R≥8 | S≤2<br>R≥8 | S≤4<br>R≥16 | S≤2/38<br>R≥4/76 |
| IHMA Clinical Isolate # | Organism            | Year Collected | Country   | Body Location                          | OMN6 | SAM (2:1)        | FEP         | CAZ         | CRO         | COL        | GEN         | LVX        | MEM        | TET         | TSX (1:19)       |
| 1974405                 | <i>A. baumannii</i> | 2019           | Germany   | Genitourinary:<br>Other                | 4    | ≤1               | ≤0.25       | 1           | 2           | 0.25       | 0.5         | ≤0.12      | ≤0.06      | 0.25        | ≤0.06            |
| 2039140                 | <i>A. baumannii</i> | 2019           | Hungary   | Respiratory:<br>Endotracheal aspirate  | 4    | 64               | 16          | >64         | >64         | 0.25       | >16         | 2          | >16        | 1           | 4                |
| 1971746                 | <i>A. baumannii</i> | 2019           | Latvia    | Gastrointestinal:<br>Pancreas          | 4    | 64               | 64          | >64         | >64         | 0.25       | >16         | 8          | >16        | >32         | 32               |
| 1989600                 | <i>A. baumannii</i> | 2019           | Germany   | Respiratory:<br>Endotracheal aspirate  | 4    | ≤1               | 2           | 4           | 8           | 0.25       | 0.5         | ≤0.12      | 0.25       | 0.25        | 0.12             |
| 2039073                 | <i>A. baumannii</i> | 2019           | Hungary   | Cardiovascular:<br>Blood               | 4    | 32               | 32          | >64         | >64         | 0.25       | >16         | 4          | >16        | 4           | 2                |
| 2031449                 | <i>A. baumannii</i> | 2019           | Greece    | Cardiovascular:<br>Blood               | 8    | 64               | 64          | >64         | >64         | 0.25       | >16         | 4          | >16        | >32         | >32              |
| 1968762                 | <i>A. baumannii</i> | 2019           | Lithuania | Respiratory:<br>Bronchoalveolar lavage | 4    | 32               | 16          | >64         | >64         | 0.25       | >16         | 4          | 16         | >32         | 0.5              |
| 2023557                 | <i>A. baumannii</i> | 2019           | Hungary   | Gastrointestinal:<br>Gall Bladder      | 4    | 64               | 8           | >64         | >64         | 0.25       | >16         | 4          | >16        | 2           | 1                |
| 1968785                 | <i>A. baumannii</i> | 2019           | Lithuania | Respiratory:<br>Bronchoalveolar lavage | 8    | 64               | 64          | 32          | >64         | 4          | 16          | 2          | >16        | >32         | 8                |
| 1983236                 | <i>A. baumannii</i> | 2019           | Greece    | Respiratory:<br>Bronchoalveolar lavage | 4    | 64               | 64          | >64         | >64         | 1          | >16         | 8          | >16        | >32         | >32              |
| 1973940                 | <i>A. baumannii</i> | 2019           | Poland    | Respiratory:<br>Endotracheal aspirate  | 4    | 8                | 8           | 64          | >64         | 0.25       | 16          | 16         | >16        | >32         | >32              |



|                               |                     |                   |          | MIC values (µg/mL)                       |      |                  |             |             |             |            |             |            |            |             |                  |
|-------------------------------|---------------------|-------------------|----------|------------------------------------------|------|------------------|-------------|-------------|-------------|------------|-------------|------------|------------|-------------|------------------|
|                               |                     |                   |          | CLSI Cut-off<br>Values (µg/mL)           | N/A  | S≤4/8<br>R≥16/32 | S≤8<br>R≥32 | S≤8<br>R≥32 | S≤8<br>R≥64 | S≤2<br>R≥8 | S≤4<br>R≥16 | S≤2<br>R≥8 | S≤2<br>R≥8 | S≤4<br>R≥16 | S≤2/38<br>R≥4/76 |
| IHMA<br>Clinical<br>Isolate # | Organism            | Year<br>Collected | Country  | Body Location                            | OMN6 | SAM<br>(2:1)     | FEP         | CAZ         | CRO         | COL        | GEN         | LVX        | MEM        | TET         | TSX<br>(1:19)    |
| 2031461                       | <i>A. baumannii</i> | 2019              | Greece   | Cardiovascular:<br>Blood                 | 8    | 64               | >64         | >64         | >64         | 1          | >16         | 8          | >16        | >32         | 32               |
| 2039136                       | <i>A. baumannii</i> | 2019              | Hungary  | Respiratory:<br>Endotracheal<br>aspirate | 8    | 32               | 32          | >64         | >64         | 0.25       | >16         | 8          | >16        | >32         | 32               |
| 2038979                       | <i>A. baumannii</i> | 2019              | Hungary  | Bodily Fluids:<br>Peritoneal             | 4    | 64               | 32          | >64         | >64         | 0.25       | >16         | 2          | >16        | 2           | 1                |
| 1973923                       | <i>A. baumannii</i> | 2019              | Poland   | Respiratory:<br>Endotracheal<br>aspirate | 4    | 32               | 8           | 64          | >64         | 0.25       | >16         | 2          | 0.25       | >32         | 16               |
| 1961080                       | <i>A. baumannii</i> | 2019              | Portugal | Cardiovascular:<br>Blood                 | 4    | 2                | 1           | 2           | 8           | 0.5        | 0.5         | ≤0.12      | 0.12       | 0.5         | ≤0.06            |
| 2078129                       | <i>A. baumannii</i> | 2019              | Italy    | Respiratory:<br>Sputum                   | 4    | 32               | 64          | >64         | >64         | 0.25       | >16         | >32        | 16         | >32         | 32               |
| 1994284                       | <i>A. baumannii</i> | 2019              | Italy    | Genitourinary:<br>Urine                  | 4    | 8                | 16          | 64          | >64         | 0.25       | >16         | 16         | 16         | >32         | 32               |
| 2019331                       | <i>A. baumannii</i> | 2019              | Romania  | Respiratory:<br>Endotracheal<br>aspirate | 8    | 32               | 64          | >64         | >64         | 0.25       | >16         | 8          | >16        | >32         | >32              |
| 2019266                       | <i>A. baumannii</i> | 2019              | Romania  | Respiratory:<br>Sputum                   | 4    | 16               | 32          | >64         | >64         | 0.25       | >16         | 8          | >16        | 0.5         | 1                |
| 2019315                       | <i>A. baumannii</i> | 2019              | Romania  | Cardiovascular:<br>Blood                 | 4    | 2                | 0.5         | 1           | 4           | 0.25       | 1           | ≤0.12      | ≤0.06      | 0.25        | 0.12             |
| 2030964                       | <i>A. baumannii</i> | 2019              | Italy    | Bodily Fluids:<br>Peritoneal             | 4    | 64               | 64          | >64         | >64         | ≤0.12      | 0.5         | 2          | >16        | >32         | 0.5              |
| 1983210                       | <i>A. baumannii</i> | 2019              | Greece   | Respiratory:<br>Bronchial<br>brushing    | 4    | 32               | 32          | >64         | >64         | >8         | >16         | 8          | >16        | 4           | 32               |



|                         |                     |                |           | MIC values (µg/mL)                  |      |                  |             |             |             |            |             |            |            |             |                  |
|-------------------------|---------------------|----------------|-----------|-------------------------------------|------|------------------|-------------|-------------|-------------|------------|-------------|------------|------------|-------------|------------------|
|                         |                     |                |           | CLSI Cut-off Values (µg/mL)         | N/A  | S≤4/8<br>R≥16/32 | S≤8<br>R≥32 | S≤8<br>R≥32 | S≤8<br>R≥64 | S≤2<br>R≥8 | S≤4<br>R≥16 | S≤2<br>R≥8 | S≤2<br>R≥8 | S≤4<br>R≥16 | S≤2/38<br>R≥4/76 |
| IHMA Clinical Isolate # | Organism            | Year Collected | Country   | Body Location                       | OMN6 | SAM (2:1)        | FEP         | CAZ         | CRO         | COL        | GEN         | LVX        | MEM        | TET         | TSX (1:19)       |
| 2078186                 | <i>A. baumannii</i> | 2019           | Italy     | Respiratory: Sputum                 | 4    | 16               | 32          | 64          | >64         | 0.25       | >16         | >32        | >16        | >32         | >32              |
| 2078054                 | <i>A. baumannii</i> | 2019           | Italy     | Respiratory: Sputum                 | 4    | 32               | 32          | 64          | >64         | 0.25       | >16         | >32        | 16         | >32         | 32               |
| 1994130                 | <i>A. baumannii</i> | 2019           | Italy     | Respiratory: Sputum                 | 8    | 8                | 16          | >64         | >64         | >8         | >16         | >32        | 16         | 8           | 32               |
| 1971730                 | <i>A. baumannii</i> | 2019           | Latvia    | Gastrointestinal: Stomach           | 8    | 32               | >64         | >64         | >64         | 0.25       | >16         | 2          | >16        | 0.5         | 4                |
| 1983240                 | <i>A. baumannii</i> | 2019           | Greece    | Respiratory: Bronchoalveolar lavage | 4    | 32               | 16          | >64         | >64         | 0.25       | >16         | 32         | 16         | >32         | 1                |
| 2031456                 | <i>A. baumannii</i> | 2019           | Greece    | Cardiovascular: Blood               | 4    | 32               | 32          | >64         | >64         | 0.25       | >16         | 32         | >16        | >32         | >32              |
| 1984552                 | <i>A. baumannii</i> | 2019           | Lithuania | Genitourinary: Urine                | 4    | 64               | 64          | >64         | >64         | 0.25       | >16         | 8          | >16        | >32         | 2                |
| 2051395                 | <i>A. baumannii</i> | 2019           | Serbia    | Cardiovascular: Blood               | 4    | 64               | 64          | >64         | >64         | 0.25       | >16         | 8          | >16        | 32          | 8                |
| 1952420                 | <i>A. baumannii</i> | 2019           | Italy     | Bodily Fluids: Peritoneal           | 4    | 16               | 16          | 32          | >64         | 0.25       | >16         | >32        | 16         | >32         | 32               |
| 2051484                 | <i>A. baumannii</i> | 2019           | Serbia    | Respiratory: Endotracheal aspirate  | 4    | 16               | 16          | >64         | >64         | 0.25       | >16         | 4          | >16        | >32         | 32               |
| 1968809                 | <i>A. baumannii</i> | 2019           | Lithuania | Respiratory: Bronchoalveolar lavage | 4    | 64               | 64          | >64         | >64         | 1          | >16         | 4          | >16        | >32         | >32              |
| 1983229                 | <i>A. baumannii</i> | 2019           | Greece    | Cardiovascular: Blood               | 4    | 64               | 64          | >64         | >64         | 1          | >16         | 8          | 16         | 4           | >32              |



|                         |                     |                |           | MIC values (µg/mL)                  |      |                  |             |             |             |            |             |            |            |             |                  |
|-------------------------|---------------------|----------------|-----------|-------------------------------------|------|------------------|-------------|-------------|-------------|------------|-------------|------------|------------|-------------|------------------|
|                         |                     |                |           | CLSI Cut-off Values (µg/mL)         | N/A  | S≤4/8<br>R≥16/32 | S≤8<br>R≥32 | S≤8<br>R≥32 | S≤8<br>R≥64 | S≤2<br>R≥8 | S≤4<br>R≥16 | S≤2<br>R≥8 | S≤2<br>R≥8 | S≤4<br>R≥16 | S≤2/38<br>R≥4/76 |
| IHMA Clinical Isolate # | Organism            | Year Collected | Country   | Body Location                       | OMN6 | SAM (2:1)        | FEP         | CAZ         | CRO         | COL        | GEN         | LVX        | MEM        | TET         | TSX (1:19)       |
| 1984668                 | <i>A. baumannii</i> | 2019           | Lithuania | Respiratory: Bronchoalveolar lavage | 8    | 64               | 64          | >64         | >64         | 0.25       | >16         | 8          | >16        | >32         | 1                |
| 1971652                 | <i>A. baumannii</i> | 2019           | Latvia    | Cardiovascular: Blood               | 8    | 16               | 32          | 16          | >64         | 0.25       | >16         | 2          | >16        | 1           | 0.12             |
| 2035039                 | <i>A. baumannii</i> | 2019           | Serbia    | Cardiovascular: Blood               | 8    | 32               | 64          | >64         | >64         | 0.25       | >16         | 16         | >16        | >32         | >32              |
| 1984695                 | <i>A. baumannii</i> | 2019           | Lithuania | Respiratory: Bronchoalveolar lavage | 4    | 8                | 8           | >64         | >64         | 0.25       | 0.5         | 2          | >16        | >32         | 16               |
| 1968732                 | <i>A. baumannii</i> | 2019           | Lithuania | Respiratory: Bronchoalveolar lavage | 4    | 64               | 64          | >64         | >64         | 0.25       | >16         | 8          | >16        | >32         | 1                |
| 1971717                 | <i>A. baumannii</i> | 2019           | Latvia    | Respiratory: Bronchoalveolar lavage | 8    | 32               | >64         | >64         | >64         | 0.25       | 2           | 2          | >16        | 1           | 8                |
| 2051611                 | <i>A. baumannii</i> | 2019           | Serbia    | Respiratory: Endotracheal aspirate  | 4    | 32               | >64         | >64         | >64         | 0.25       | >16         | 8          | >16        | >32         | >32              |
| 1983199                 | <i>A. baumannii</i> | 2019           | Greece    | Genitourinary: Urine                | 4    | 32               | 64          | >64         | >64         | 0.25       | >16         | 8          | >16        | >32         | >32              |
| 2051610                 | <i>A. baumannii</i> | 2019           | Serbia    | Cardiovascular: Blood               | 4    | 16               | 8           | >64         | >64         | ≤0.12      | 1           | 32         | >16        | 1           | 8                |
| 1971808                 | <i>A. baumannii</i> | 2019           | Latvia    | Respiratory: Sputum                 | 8    | 16               | 32          | 16          | >64         | 0.25       | 1           | 2          | >16        | 1           | 0.12             |
| 2051433                 | <i>A. baumannii</i> | 2019           | Serbia    | Gastrointestinal: Liver             | 4    | 16               | 8           | 64          | >64         | 0.25       | >16         | 2          | >16        | >32         | 1                |



|                         |                     |                |           | MIC values (µg/mL)                  |      |                  |             |             |             |            |             |            |            |             |                  |
|-------------------------|---------------------|----------------|-----------|-------------------------------------|------|------------------|-------------|-------------|-------------|------------|-------------|------------|------------|-------------|------------------|
|                         |                     |                |           | CLSI Cut-off Values (µg/mL)         | N/A  | S≤4/8<br>R≥16/32 | S≤8<br>R≥32 | S≤8<br>R≥32 | S≤8<br>R≥64 | S≤2<br>R≥8 | S≤4<br>R≥16 | S≤2<br>R≥8 | S≤2<br>R≥8 | S≤4<br>R≥16 | S≤2/38<br>R≥4/76 |
| IHMA Clinical Isolate # | Organism            | Year Collected | Country   | Body Location                       | OMN6 | SAM (2:1)        | FEP         | CAZ         | CRO         | COL        | GEN         | LVX        | MEM        | TET         | TSX (1:19)       |
| 2039139                 | <i>A. baumannii</i> | 2019           | Hungary   | Respiratory: Endotracheal aspirate  | 4    | 32               | 16          | >64         | >64         | 0.25       | >16         | 4          | >16        | 2           | 1                |
| 1971810                 | <i>A. baumannii</i> | 2019           | Latvia    | Respiratory: Bronchoalveolar lavage | 8    | 16               | 32          | 16          | >64         | 0.25       | >16         | 2          | >16        | 0.5         | 0.12             |
| 2058360                 | <i>A. baumannii</i> | 2019           | Slovenia  | Genitourinary: Urine                | 8    | 4                | 4           | 16          | >64         | 0.25       | >16         | 1          | 0.5        | 1           | 0.12             |
| 1984733                 | <i>A. baumannii</i> | 2019           | Lithuania | Cardiovascular: Blood               | 4    | 64               | 64          | >64         | >64         | 0.25       | >16         | 4          | >16        | >32         | 2                |
| 2058247                 | <i>A. baumannii</i> | 2019           | Slovenia  | Respiratory: Bronchoalveolar lavage | 4    | ≤1               | 1           | 2           | 8           | 0.25       | 0.25        | ≤0.12      | ≤0.06      | 0.25        | 0.12             |
| 1967860                 | <i>A. baumannii</i> | 2019           | Spain     | Cardiovascular: Blood               | 8    | 2                | 4           | 2           | 8           | 0.25       | 4           | ≤0.12      | 0.12       | >32         | 0.25             |
| 2039121                 | <i>A. baumannii</i> | 2019           | Hungary   | Respiratory: Endotracheal aspirate  | 8    | 64               | 8           | >64         | >64         | 0.25       | >16         | 8          | 8          | 2           | 16               |
| 2007374                 | <i>A. baumannii</i> | 2019           | Spain     | Respiratory: Sputum                 | 4    | 32               | 32          | 8           | 32          | 0.25       | 0.5         | 16         | >16        | >32         | 2                |
| 2014048                 | <i>A. baumannii</i> | 2019           | Sweden    | Gastrointestinal: Stomach           | 8    | 8                | 8           | >64         | >64         | >8         | >16         | >32        | 16         | 8           | 32               |
| 1984688                 | <i>A. baumannii</i> | 2019           | Lithuania | Respiratory: Bronchoalveolar lavage | 4    | 64               | 64          | >64         | >64         | 0.25       | >16         | 8          | >16        | >32         | 1                |
| 2039155                 | <i>A. baumannii</i> | 2019           | Hungary   | Respiratory: Bronchoalveolar lavage | 4    | 32               | 32          | >64         | >64         | 0.25       | >16         | 16         | 16         | >32         | 32               |



|                         |                     |                |           | MIC values (µg/mL)                 |      |                  |             |             |             |            |             |            |            |             |                  |
|-------------------------|---------------------|----------------|-----------|------------------------------------|------|------------------|-------------|-------------|-------------|------------|-------------|------------|------------|-------------|------------------|
|                         |                     |                |           | CLSI Cut-off Values (µg/mL)        | N/A  | S≤4/8<br>R≥16/32 | S≤8<br>R≥32 | S≤8<br>R≥32 | S≤8<br>R≥64 | S≤2<br>R≥8 | S≤4<br>R≥16 | S≤2<br>R≥8 | S≤2<br>R≥8 | S≤4<br>R≥16 | S≤2/38<br>R≥4/76 |
| IHMA Clinical Isolate # | Organism            | Year Collected | Country   | Body Location                      | OMN6 | SAM (2:1)        | FEP         | CAZ         | CRO         | COL        | GEN         | LVX        | MEM        | TET         | TSX (1:19)       |
| 1984669                 | <i>A. baumannii</i> | 2019           | Lithuania | Respiratory: Endotracheal aspirate | 4    | 32               | 64          | >64         | >64         | 0.25       | >16         | 8          | >16        | >32         | 0.5              |
| 1973792                 | <i>A. baumannii</i> | 2019           | Poland    | Cardiovascular: Blood              | 8    | 8                | 8           | 64          | >64         | 0.25       | 16          | 16         | >16        | >32         | >32              |
| 2108908                 | <i>A. baumannii</i> | 2019           | Italy     | Gastrointestinal: Abscess          | 4    | 4                | 8           | 64          | >64         | ≤0.12      | >16         | 16         | 8          | ≤0.12       | 4                |
| 2078203                 | <i>A. baumannii</i> | 2019           | Italy     | Cardiovascular: Blood              | 4    | 32               | 64          | 64          | >64         | 0.5        | >16         | 16         | >16        | >32         | 16               |
| 1971626                 | <i>A. baumannii</i> | 2019           | Latvia    | Cardiovascular: Blood              | 4    | 16               | 32          | 16          | >64         | 0.25       | >16         | 2          | >16        | 1           | 0.12             |
| 2003382                 | <i>A. baumannii</i> | 2019           | Turkey    | Cardiovascular: Blood              | 4    | 4                | 8           | 8           | >64         | 0.25       | >16         | 4          | 0.5        | 1           | 0.12             |
| 1971716                 | <i>A. baumannii</i> | 2019           | Latvia    | Respiratory: Sputum                | 8    | 32               | >64         | >64         | >64         | 0.25       | 1           | 4          | >16        | 0.5         | 4                |
| 1984758                 | <i>A. baumannii</i> | 2019           | Lithuania | Cardiovascular: Blood              | 4    | 4                | 4           | 16          | >64         | ≤0.12      | >16         | 0.5        | 0.5        | >32         | 8                |
| 1963810                 | <i>A. baumannii</i> | 2019           | Turkey    | Genitourinary: Urine               | 4    | 32               | 32          | 32          | >64         | 0.25       | 2           | >32        | 16         | >32         | >32              |
| 1957343                 | <i>A. baumannii</i> | 2019           | Portugal  | Gastrointestinal: Gall Bladder     | 4    | 2                | 2           | 4           | 8           | ≤0.12      | 0.5         | ≤0.12      | 0.12       | 0.5         | 0.12             |
| 1993625                 | <i>A. baumannii</i> | 2019           | Turkey    | Respiratory: Endotracheal aspirate | 8    | 4                | 32          | >64         | >64         | 0.25       | >16         | 32         | >16        | >32         | >32              |
| 1963865                 | <i>A. baumannii</i> | 2019           | Turkey    | Bodily Fluids: Thoracentesis       | 4    | 32               | 32          | 32          | >64         | 0.5        | 4           | >32        | 16         | >32         | >32              |
| 1984666                 | <i>A. baumannii</i> | 2019           | Lithuania | Respiratory: Endotracheal aspirate | 8    | 64               | 64          | >64         | >64         | 0.5        | >16         | 8          | >16        | >32         | 1                |



|                         |                     |                |           | MIC values (µg/mL)                  |      |                  |             |             |             |            |             |            |            |             |                  |
|-------------------------|---------------------|----------------|-----------|-------------------------------------|------|------------------|-------------|-------------|-------------|------------|-------------|------------|------------|-------------|------------------|
|                         |                     |                |           | CLSI Cut-off Values (µg/mL)         | N/A  | S≤4/8<br>R≥16/32 | S≤8<br>R≥32 | S≤8<br>R≥32 | S≤8<br>R≥64 | S≤2<br>R≥8 | S≤4<br>R≥16 | S≤2<br>R≥8 | S≤2<br>R≥8 | S≤4<br>R≥16 | S≤2/38<br>R≥4/76 |
| IHMA Clinical Isolate # | Organism            | Year Collected | Country   | Body Location                       | OMN6 | SAM (2:1)        | FEP         | CAZ         | CRO         | COL        | GEN         | LVX        | MEM        | TET         | TSX (1:19)       |
| 1984671                 | <i>A. baumannii</i> | 2019           | Lithuania | Respiratory: Bronchial brushing     | 8    | 64               | 64          | >64         | >64         | 0.25       | >16         | 8          | >16        | >32         | 1                |
| 2003388                 | <i>A. baumannii</i> | 2019           | Turkey    | Cardiovascular: Blood               | 4    | 4                | 8           | 8           | >64         | 0.25       | >16         | 4          | 0.5        | 1           | 0.12             |
| 2003373                 | <i>A. baumannii</i> | 2019           | Turkey    | Cardiovascular: Blood               | 4    | 2                | 1           | 2           | 8           | 0.25       | 0.25        | ≤0.12      | 0.12       | 0.5         | ≤0.06            |
| 1993618                 | <i>A. baumannii</i> | 2019           | Turkey    | Respiratory: Bronchoalveolar lavage | 4    | 32               | 32          | >64         | >64         | 0.5        | >16         | 32         | >16        | >32         | >32              |
| 1973996                 | <i>A. baumannii</i> | 2019           | Poland    | Respiratory: Endotracheal aspirate  | 4    | 2                | 4           | 4           | 16          | 0.25       | 0.5         | ≤0.12      | 0.12       | 0.5         | 0.5              |
| 1993626                 | <i>A. baumannii</i> | 2019           | Turkey    | Respiratory: Sputum                 | 8    | >64              | 64          | >64         | >64         | 0.25       | >16         | 8          | >16        | >32         | 1                |
| 2066250                 | <i>A. baumannii</i> | 2019           | Poland    | Bodily Fluids: Peritoneal           | 8    | 8                | 16          | >64         | >64         | 0.25       | 2           | 8          | >16        | >32         | >32              |
| 2035030                 | <i>A. baumannii</i> | 2019           | Serbia    | Respiratory: Endotracheal aspirate  | 8    | 16               | 32          | >64         | >64         | 0.25       | >16         | 8          | >16        | >32         | >32              |
| 2035026                 | <i>A. baumannii</i> | 2019           | Serbia    | Respiratory: Endotracheal aspirate  | 4    | 32               | 16          | >64         | >64         | 0.25       | >16         | 4          | >16        | >32         | >32              |
| 1993617                 | <i>A. baumannii</i> | 2019           | Turkey    | Respiratory: Endotracheal aspirate  | 4    | 8                | 16          | 32          | >64         | >8         | >16         | 16         | 16         | >32         | 32               |
| 2003371                 | <i>A. baumannii</i> | 2019           | Turkey    | Cardiovascular: Blood               | 4    | 64               | 32          | >64         | >64         | 0.25       | 0.25        | 16         | >16        | >32         | >32              |



|                         |                     |                |         | MIC values (µg/mL)                 |      |                  |             |             |             |            |             |            |            |             |                  |
|-------------------------|---------------------|----------------|---------|------------------------------------|------|------------------|-------------|-------------|-------------|------------|-------------|------------|------------|-------------|------------------|
|                         |                     |                |         | CLSI Cut-off Values (µg/mL)        | N/A  | S≤4/8<br>R≥16/32 | S≤8<br>R≥32 | S≤8<br>R≥32 | S≤8<br>R≥64 | S≤2<br>R≥8 | S≤4<br>R≥16 | S≤2<br>R≥8 | S≤2<br>R≥8 | S≤4<br>R≥16 | S≤2/38<br>R≥4/76 |
| IHMA Clinical Isolate # | Organism            | Year Collected | Country | Body Location                      | OMN6 | SAM (2:1)        | FEP         | CAZ         | CRO         | COL        | GEN         | LVX        | MEM        | TET         | TSX (1:19)       |
| 1973970                 | <i>A. baumannii</i> | 2019           | Poland  | Respiratory: Endotracheal aspirate | 4    | 8                | 16          | 64          | >64         | 2          | 0.25        | 4          | >16        | >32         | >32              |
| 2035464                 | <i>A. baumannii</i> | 2019           | Ukraine | Respiratory: Sputum                | 4    | 32               | 64          | 16          | >64         | 0.25       | >16         | 4          | 16         | 4           | 1                |
| 2019236                 | <i>A. baumannii</i> | 2019           | Romania | Cardiovascular: Blood              | 8    | 64               | 32          | >64         | >64         | 0.25       | >16         | 4          | 1          | >32         | >32              |
| 2035089                 | <i>A. baumannii</i> | 2019           | Serbia  | Respiratory: Endotracheal aspirate | 8    | 32               | 32          | >64         | >64         | 0.25       | >16         | 8          | >16        | >32         | >32              |
| 2118005                 | <i>A. baumannii</i> | 2019           | Russia  | Gastrointestinal: Large Colon      | 4    | 2                | 1           | 2           | 8           | 0.25       | 0.25        | ≤0.12      | 0.12       | 0.25        | 0.12             |
| 2035500                 | <i>A. baumannii</i> | 2019           | Ukraine | Cardiovascular: Blood              | 4    | 4                | 8           | 32          | >64         | 0.25       | 4           | 8          | 8          | 1           | 4                |
| 2118004                 | <i>A. baumannii</i> | 2019           | Russia  | Gastrointestinal: Large Colon      | 8    | 8                | 4           | 32          | >64         | 0.25       | 4           | 32         | 16         | 2           | 4                |
| 2029125                 | <i>A. baumannii</i> | 2019           | Ukraine | Cardiovascular: Blood              | 8    | 4                | 4           | 16          | >64         | 1          | 0.25        | 4          | 0.5        | 1           | 4                |
| 1973963                 | <i>A. baumannii</i> | 2019           | Poland  | Respiratory: Endotracheal aspirate | 4    | 16               | 32          | >64         | >64         | 0.25       | 0.5         | 4          | 2          | >32         | >32              |
| 2060117                 | <i>A. baumannii</i> | 2019           | Russia  | Gastrointestinal: Abscess          | 4    | >64              | >64         | >64         | >64         | 0.25       | >16         | 8          | >16        | 2           | 32               |
| 2035090                 | <i>A. baumannii</i> | 2019           | Serbia  | Respiratory: Endotracheal aspirate | 8    | 16               | 32          | >64         | >64         | 0.25       | >16         | 8          | >16        | >32         | >32              |
| 2051501                 | <i>A. baumannii</i> | 2019           | Serbia  | Genitourinary: Urine               | 8    | 16               | 16          | >64         | >64         | 0.25       | >16         | 8          | 16         | >32         | >32              |



|                         |                     |                |             | MIC values (µg/mL)                 |      |                  |             |             |             |            |             |            |            |             |                  |
|-------------------------|---------------------|----------------|-------------|------------------------------------|------|------------------|-------------|-------------|-------------|------------|-------------|------------|------------|-------------|------------------|
|                         |                     |                |             | CLSI Cut-off Values (µg/mL)        | N/A  | S≤4/8<br>R≥16/32 | S≤8<br>R≥32 | S≤8<br>R≥32 | S≤8<br>R≥64 | S≤2<br>R≥8 | S≤4<br>R≥16 | S≤2<br>R≥8 | S≤2<br>R≥8 | S≤4<br>R≥16 | S≤2/38<br>R≥4/76 |
| IHMA Clinical Isolate # | Organism            | Year Collected | Country     | Body Location                      | OMN6 | SAM (2:1)        | FEP         | CAZ         | CRO         | COL        | GEN         | LVX        | MEM        | TET         | TSX (1:19)       |
| 2051527                 | <i>A. baumannii</i> | 2019           | Serbia      | Respiratory: Endotracheal aspirate | 4    | 16               | 8           | 64          | >64         | 0.25       | 0.25        | 2          | >16        | >32         | 0.5              |
| 2058329                 | <i>A. baumannii</i> | 2019           | Slovenia    | Cardiovascular: Blood              | 8    | 2                | 1           | 2           | 8           | 0.25       | 0.5         | ≤0.12      | ≤0.06      | 0.5         | ≤0.06            |
| 1957424                 | <i>A. baumannii</i> | 2019           | Portugal    | Cardiovascular: Blood              | 4    | 16               | 16          | 64          | >64         | 0.25       | >16         | 32         | 16         | >32         | 32               |
| 2035052                 | <i>A. baumannii</i> | 2019           | Serbia      | Bodily Fluids: Peritoneal          | 8    | 32               | 32          | >64         | >64         | 0.5        | >16         | 16         | >16        | >32         | 32               |
| 1957322                 | <i>A. baumannii</i> | 2019           | Portugal    | Genitourinary: Urine               | 4    | 8                | 4           | 1           | 4           | 0.25       | 1           | 32         | 8          | >32         | 0.5              |
| 2019421                 | <i>A. baumannii</i> | 2019           | Romania     | Cardiovascular: Blood              | 4    | 8                | 32          | >64         | >64         | 0.25       | 1           | 4          | 16         | 4           | 0.12             |
| 2003517                 | <i>A. baumannii</i> | 2019           | Turkey      | Respiratory: Endotracheal aspirate | 4    | >64              | >64         | >64         | >64         | 0.25       | >16         | 16         | >16        | >32         | 32               |
| 1970734                 | <i>A. baumannii</i> | 2019           | Switzerland | Respiratory: Sputum                | 4    | >64              | >64         | >64         | >64         | 0.25       | >16         | 32         | >16        | 8           | 0.5              |
| 2062415                 | <i>A. baumannii</i> | 2019           | Russia      | Bodily Fluids: Peritoneal          | 4    | 64               | >64         | >64         | >64         | ≤0.12      | 8           | >32        | >16        | >32         | >32              |
| 2035064                 | <i>A. baumannii</i> | 2019           | Serbia      | Cardiovascular: Blood              | 8    | 32               | 32          | >64         | >64         | 0.25       | >16         | 8          | >16        | >32         | >32              |
| 1993813                 | <i>A. baumannii</i> | 2019           | Turkey      | Cardiovascular: Blood              | 4    | >64              | 32          | 64          | >64         | 0.25       | ≤0.12       | 16         | >16        | >32         | >32              |
| 2009420                 | <i>A. baumannii</i> | 2019           | Turkey      | Gastrointestinal: Other            | 4    | 64               | 64          | >64         | >64         | ≤0.12      | 0.25        | 16         | >16        | >32         | >32              |
| 1993762                 | <i>A. baumannii</i> | 2019           | Turkey      | Bodily Fluids: Abscess / Pus       | 8    | >64              | >64         | >64         | >64         | 1          | 0.25        | 16         | >16        | >32         | >32              |



|                         |                     |                |                | MIC values (µg/mL)                 |      |                  |             |             |             |            |             |            |            |             |                  |
|-------------------------|---------------------|----------------|----------------|------------------------------------|------|------------------|-------------|-------------|-------------|------------|-------------|------------|------------|-------------|------------------|
|                         |                     |                |                | CLSI Cut-off Values (µg/mL)        | N/A  | S≤4/8<br>R≥16/32 | S≤8<br>R≥32 | S≤8<br>R≥32 | S≤8<br>R≥64 | S≤2<br>R≥8 | S≤4<br>R≥16 | S≤2<br>R≥8 | S≤2<br>R≥8 | S≤4<br>R≥16 | S≤2/38<br>R≥4/76 |
| IHMA Clinical Isolate # | Organism            | Year Collected | Country        | Body Location                      | OMN6 | SAM (2:1)        | FEP         | CAZ         | CRO         | COL        | GEN         | LVX        | MEM        | TET         | TSX (1:19)       |
| 2051483                 | <i>A. baumannii</i> | 2019           | Serbia         | Cardiovascular: Blood              | 4    | 32               | 16          | >64         | >64         | 0.25       | >16         | 4          | >16        | 4           | 8                |
| 1986579                 | <i>A. baumannii</i> | 2019           | Turkey         | Respiratory: Endotracheal aspirate | 4    | 64               | >64         | >64         | >64         | 0.25       | >16         | 8          | 8          | 2           | 32               |
| 1963864                 | <i>A. baumannii</i> | 2019           | Turkey         | Respiratory: Lungs                 | 4    | 64               | 32          | 64          | >64         | 0.5        | 2           | >32        | 16         | >32         | >32              |
| 2051432                 | <i>A. baumannii</i> | 2019           | Serbia         | Gastrointestinal: Stomach          | 4    | 32               | 32          | >64         | >64         | 0.25       | >16         | 8          | >16        | >32         | 1                |
| 2003491                 | <i>A. baumannii</i> | 2019           | Turkey         | Cardiovascular: Blood              | 4    | 32               | 64          | >64         | >64         | 0.25       | 8           | 16         | >16        | >32         | >32              |
| 2051455                 | <i>A. baumannii</i> | 2019           | Serbia         | Genitourinary: Urine               | 4    | 32               | 64          | 64          | >64         | 0.25       | >16         | 8          | >16        | 8           | 32               |
| 1968017                 | <i>A. baumannii</i> | 2019           | Spain          | Respiratory: Endotracheal aspirate | 4    | 2                | 1           | 2           | 8           | 0.25       | 0.5         | ≤0.12      | ≤0.06      | 0.5         | ≤0.06            |
| 2081197                 | <i>A. baumannii</i> | 2019           | Spain          | Gastrointestinal: Other            | 4    | 16               | 16          | 4           | 32          | 1          | >16         | 32         | >16        | >32         | 1                |
| 2003464                 | <i>A. baumannii</i> | 2019           | Turkey         | Cardiovascular: Blood              | 8    | 32               | 32          | >64         | >64         | 0.5        | >16         | 8          | >16        | >32         | 2                |
| 2023039                 | <i>A. baumannii</i> | 2019           | United Kingdom | Bodily Fluids: Peritoneal          | 8    | ≤1               | 1           | 2           | 8           | 0.25       | 0.5         | ≤0.12      | ≤0.06      | 0.25        | 0.12             |
| 2003503                 | <i>A. baumannii</i> | 2019           | Turkey         | Gastrointestinal: Other            | 4    | 16               | 64          | >64         | >64         | 0.25       | 2           | 8          | 16         | >32         | >32              |
| 1987322                 | <i>A. baumannii</i> | 2019           | Georgia        | Respiratory: Endotracheal aspirate | 4    | 16               | 64          | >64         | >64         | ≤0.12      | ≤0.12       | 8          | >16        | >32         | 8                |
| 1963731                 | <i>A. baumannii</i> | 2019           | Turkey         | Genitourinary: Urine               | 8    | 16               | 16          | >64         | >64         | >8         | >16         | >32        | >16        | >32         | >32              |



|                         |                     |                |         | MIC values (µg/mL)                 |      |                  |             |             |             |            |             |            |            |             |                  |
|-------------------------|---------------------|----------------|---------|------------------------------------|------|------------------|-------------|-------------|-------------|------------|-------------|------------|------------|-------------|------------------|
|                         |                     |                |         | CLSI Cut-off Values (µg/mL)        | N/A  | S≤4/8<br>R≥16/32 | S≤8<br>R≥32 | S≤8<br>R≥32 | S≤8<br>R≥64 | S≤2<br>R≥8 | S≤4<br>R≥16 | S≤2<br>R≥8 | S≤2<br>R≥8 | S≤4<br>R≥16 | S≤2/38<br>R≥4/76 |
| IHMA Clinical Isolate # | Organism            | Year Collected | Country | Body Location                      | OMN6 | SAM (2:1)        | FEP         | CAZ         | CRO         | COL        | GEN         | LVX        | MEM        | TET         | TSX (1:19)       |
| 1986725                 | <i>A. baumannii</i> | 2019           | Turkey  | Cardiovascular: Blood              | 4    | 2                | 2           | 4           | 16          | 0.25       | 0.25        | ≤0.12      | ≤0.06      | 0.5         | 0.12             |
| 1975034                 | <i>A. baumannii</i> | 2019           | Israel  | Cardiovascular: Blood              | 4    | 32               | 32          | 64          | >64         | 0.25       | >16         | 2          | >16        | 2           | 32               |
| 1993627                 | <i>A. baumannii</i> | 2019           | Turkey  | Respiratory: Sputum                | 8    | 64               | 32          | >64         | >64         | 2          | >16         | 8          | >16        | >32         | 32               |
| 1986635                 | <i>A. baumannii</i> | 2019           | Turkey  | Respiratory: Endotracheal aspirate | 8    | 2                | 2           | 4           | 16          | 0.25       | 0.25        | ≤0.12      | 0.12       | 0.5         | 0.12             |
| 2003318                 | <i>A. baumannii</i> | 2019           | Turkey  | Respiratory: Endotracheal aspirate | 4    | >64              | >64         | >64         | >64         | 0.25       | >16         | 8          | >16        | >32         | 32               |
| 2035431                 | <i>A. baumannii</i> | 2019           | Ukraine | Respiratory: Sputum                | 8    | >64              | >64         | 32          | >64         | 0.25       | >16         | 8          | >16        | 2           | 1                |
| 1975151                 | <i>A. baumannii</i> | 2019           | Israel  | Respiratory: Sputum                | 8    | 4                | 2           | 2           | 8           | 0.5        | >16         | ≤0.12      | 0.25       | 1           | ≤0.06            |
| 2029115                 | <i>A. baumannii</i> | 2019           | Ukraine | Bodily Fluids: Abscess / Pus       | 8    | 32               | >64         | >64         | >64         | 0.25       | >16         | 8          | 4          | 2           | >32              |
| 1993619                 | <i>A. baumannii</i> | 2019           | Turkey  | Respiratory: Sputum                | 4    | 32               | 32          | >64         | >64         | 0.25       | >16         | 8          | >16        | >32         | >32              |
| 2035340                 | <i>A. baumannii</i> | 2019           | Ukraine | Genitourinary: Urine               | 4    | 2                | 2           | 2           | 16          | 0.25       | 0.25        | ≤0.12      | 0.25       | 1           | 0.12             |
| 2035401                 | <i>A. baumannii</i> | 2019           | Ukraine | Respiratory: Endotracheal aspirate | 4    | 64               | >64         | 64          | >64         | 0.25       | >16         | 8          | 8          | 0.5         | 4                |
| 2003279                 | <i>A. baumannii</i> | 2019           | Turkey  | Genitourinary: Urine               | 8    | 64               | 64          | >64         | >64         | 0.25       | >16         | 4          | >16        | >32         | 32               |



|                         |                     |                |                | MIC values (µg/mL)                  |      |                  |             |             |             |            |             |            |            |             |                  |
|-------------------------|---------------------|----------------|----------------|-------------------------------------|------|------------------|-------------|-------------|-------------|------------|-------------|------------|------------|-------------|------------------|
|                         |                     |                |                | CLSI Cut-off Values (µg/mL)         | N/A  | S≤4/8<br>R≥16/32 | S≤8<br>R≥32 | S≤8<br>R≥32 | S≤8<br>R≥64 | S≤2<br>R≥8 | S≤4<br>R≥16 | S≤2<br>R≥8 | S≤2<br>R≥8 | S≤4<br>R≥16 | S≤2/38<br>R≥4/76 |
| IHMA Clinical Isolate # | Organism            | Year Collected | Country        | Body Location                       | OMN6 | SAM (2:1)        | FEP         | CAZ         | CRO         | COL        | GEN         | LVX        | MEM        | TET         | TSX (1:19)       |
| 2020256                 | <i>A. baumannii</i> | 2019           | Israel         | Respiratory: Endotracheal aspirate  | 4    | 2                | 0.5         | 1           | 1           | 0.25       | 0.25        | ≤0.12      | ≤0.06      | ≤0.12       | 0.25             |
| 2029130                 | <i>A. baumannii</i> | 2019           | Ukraine        | Cardiovascular: Blood               | 8    | 32               | >64         | >64         | >64         | 0.25       | >16         | 8          | 4          | 1           | >32              |
| 1963207                 | <i>A. baumannii</i> | 2019           | Israel         | Respiratory: Sputum                 | 4    | 4                | 4           | 4           | 32          | ≤0.12      | >16         | 4          | 2          | >32         | >32              |
| 1986495                 | <i>A. baumannii</i> | 2019           | Turkey         | Respiratory: Endotracheal aspirate  | 4    | ≤1               | 0.5         | 1           | 4           | 0.5        | 0.25        | ≤0.12      | ≤0.06      | 0.25        | ≤0.06            |
| 2029235                 | <i>A. baumannii</i> | 2019           | Ukraine        | Respiratory: Sputum                 | 4    | 4                | 16          | >64         | >64         | 0.25       | 1           | >32        | 0.5        | 4           | 1                |
| 1969114                 | <i>A. baumannii</i> | 2019           | Israel         | Respiratory: Bronchoalveolar lavage | 8    | 2                | 1           | 2           | 8           | 0.25       | 0.5         | ≤0.12      | 0.12       | 0.5         | 0.12             |
| 1968966                 | <i>A. baumannii</i> | 2019           | Israel         | Respiratory: Sputum                 | 8    | 8                | 64          | >64         | >64         | 0.25       | 8           | 4          | 16         | >32         | >32              |
| 1993622                 | <i>A. baumannii</i> | 2019           | Turkey         | Respiratory: Sputum                 | 8    | 16               | 32          | 64          | >64         | 0.25       | 0.5         | 32         | >16        | >32         | >32              |
| 2029141                 | <i>A. baumannii</i> | 2019           | Ukraine        | Cardiovascular: Blood               | 4    | 32               | 64          | >64         | >64         | 0.25       | 1           | >32        | >16        | 4           | 1                |
| 1969318                 | <i>A. baumannii</i> | 2019           | United Kingdom | Respiratory: Sputum                 | 4    | 64               | 64          | >64         | >64         | 0.25       | >16         | 16         | >16        | >32         | 32               |
| 1958932                 | <i>A. baumannii</i> | 2019           | United Kingdom | Gastrointestinal: Other             | 4    | ≤1               | 1           | 1           | 8           | ≤0.12      | 0.5         | ≤0.12      | 0.12       | 1           | 0.12             |
| 2029201                 | <i>A. baumannii</i> | 2019           | Ukraine        | Bodily Fluids: Abscess / Pus        | 8    | 4                | 4           | 16          | >64         | 2          | 0.25        | 4          | 0.25       | 1           | 8                |



|                         |                     |                |                | MIC values (µg/mL)                 |      |                  |             |             |             |            |             |            |            |             |                  |
|-------------------------|---------------------|----------------|----------------|------------------------------------|------|------------------|-------------|-------------|-------------|------------|-------------|------------|------------|-------------|------------------|
|                         |                     |                |                | CLSI Cut-off Values (µg/mL)        | N/A  | S≤4/8<br>R≥16/32 | S≤8<br>R≥32 | S≤8<br>R≥32 | S≤8<br>R≥64 | S≤2<br>R≥8 | S≤4<br>R≥16 | S≤2<br>R≥8 | S≤2<br>R≥8 | S≤4<br>R≥16 | S≤2/38<br>R≥4/76 |
| IHMA Clinical Isolate # | Organism            | Year Collected | Country        | Body Location                      | OMN6 | SAM (2:1)        | FEP         | CAZ         | CRO         | COL        | GEN         | LVX        | MEM        | TET         | TSX (1:19)       |
| 2029860                 | <i>A. baumannii</i> | 2019           | United Kingdom | Respiratory: Endotracheal aspirate | 4    | ≤1               | ≤0.25       | 1           | 2           | 0.25       | 0.25        | ≤0.12      | ≤0.06      | 0.25        | ≤0.06            |
| 2030102                 | <i>A. baumannii</i> | 2019           | United Kingdom | Respiratory: Sputum                | 8    | 64               | 64          | >64         | >64         | 0.5        | >16         | 8          | >16        | >32         | 2                |
| 2028775                 | <i>A. baumannii</i> | 2019           | United Kingdom | Respiratory: Endotracheal aspirate | 8    | 8                | 16          | >64         | >64         | 0.25       | 1           | 4          | 4          | 2           | 32               |
| 1987384                 | <i>A. baumannii</i> | 2019           | Georgia        | Respiratory: Endotracheal aspirate | 8    | 64               | 64          | >64         | >64         | 0.25       | >16         | 32         | >16        | >32         | 1                |
| 1974979                 | <i>A. baumannii</i> | 2019           | Israel         | Respiratory: Sputum                | 8    | 32               | 64          | >64         | >64         | 0.25       | 16          | 4          | >16        | >32         | 32               |
| 1985503                 | <i>A. baumannii</i> | 2019           | Venezuela      | Bodily Fluids: Abscess / Pus       | 4    | 64               | >64         | >64         | >64         | 0.25       | >16         | 8          | >16        | 4           | 0.25             |
| 2029216                 | <i>A. baumannii</i> | 2019           | Ukraine        | Respiratory: Endotracheal aspirate | 4    | 4                | 4           | 16          | >64         | 2          | 0.25        | 4          | 0.25       | 1           | 4                |
| 1975232                 | <i>A. baumannii</i> | 2019           | Israel         | Respiratory: Sputum                | 4    | ≤1               | 8           | 4           | 16          | 0.25       | 2           | ≤0.12      | 0.12       | 0.5         | 2                |
| 1975222                 | <i>A. baumannii</i> | 2019           | Israel         | Respiratory: Sputum                | 4    | ≤1               | ≤0.25       | 1           | 4           | 0.25       | 0.25        | ≤0.12      | ≤0.06      | 0.25        | 0.12             |
| 2020245                 | <i>A. baumannii</i> | 2019           | Israel         | Respiratory: Endotracheal aspirate | 4    | 2                | 2           | 4           | 8           | 0.25       | >16         | 1          | 0.12       | 1           | 4                |
| 2020241                 | <i>A. baumannii</i> | 2019           | Israel         | Respiratory: Endotracheal aspirate | 4    | 4                | 4           | 4           | 16          | ≤0.12      | 0.5         | ≤0.12      | 0.5        | 1           | 2                |



|                         |                     |                |                | MIC values (µg/mL)                 |      |                  |             |             |             |            |             |            |            |             |                  |
|-------------------------|---------------------|----------------|----------------|------------------------------------|------|------------------|-------------|-------------|-------------|------------|-------------|------------|------------|-------------|------------------|
|                         |                     |                |                | CLSI Cut-off Values (µg/mL)        | N/A  | S≤4/8<br>R≥16/32 | S≤8<br>R≥32 | S≤8<br>R≥32 | S≤8<br>R≥64 | S≤2<br>R≥8 | S≤4<br>R≥16 | S≤2<br>R≥8 | S≤2<br>R≥8 | S≤4<br>R≥16 | S≤2/38<br>R≥4/76 |
| IHMA Clinical Isolate # | Organism            | Year Collected | Country        | Body Location                      | OMN6 | SAM (2:1)        | FEP         | CAZ         | CRO         | COL        | GEN         | LVX        | MEM        | TET         | TSX (1:19)       |
| 2014367                 | <i>A. baumannii</i> | 2019           | Jordan         | Genitourinary: Urine               | 4    | 2                | 1           | 4           | 8           | ≤0.12      | 0.25        | ≤0.12      | ≤0.06      | 0.25        | 0.12             |
| 2035493                 | <i>A. baumannii</i> | 2019           | Ukraine        | Cardiovascular: Blood              | 4    | 64               | 64          | 16          | >64         | 0.25       | >16         | 4          | >16        | 4           | 1                |
| 1987378                 | <i>A. baumannii</i> | 2019           | Georgia        | Respiratory: Endotracheal aspirate | 4    | >64              | >64         | 32          | >64         | 0.25       | >16         | 16         | >16        | 2           | 4                |
| 1987388                 | <i>A. baumannii</i> | 2019           | Georgia        | Respiratory: Endotracheal aspirate | 8    | 64               | >64         | 32          | >64         | 0.25       | >16         | 32         | >16        | 2           | 2                |
| 2035462                 | <i>A. baumannii</i> | 2019           | Ukraine        | Respiratory: Endotracheal aspirate | 8    | 64               | >64         | 64          | >64         | 0.25       | 8           | 16         | >16        | 1           | 8                |
| 1987290                 | <i>A. baumannii</i> | 2019           | Georgia        | Respiratory: Endotracheal aspirate | 4    | 32               | >64         | 32          | >64         | 2          | >16         | 16         | >16        | 4           | 4                |
| 2028591                 | <i>A. baumannii</i> | 2019           | United Kingdom | Cardiovascular: Blood              | 8    | ≤1               | 1           | 2           | 4           | 0.5        | 0.5         | ≤0.12      | ≤0.06      | 0.25        | ≤0.06            |
| 1987331                 | <i>A. baumannii</i> | 2019           | Georgia        | Respiratory: Endotracheal aspirate | 4    | 64               | >64         | 32          | 64          | 0.25       | >16         | 8          | >16        | 0.5         | 1                |
| 1975524                 | <i>A. baumannii</i> | 2019           | Israel         | Respiratory: Sputum                | 4    | 16               | 64          | >64         | >64         | 0.25       | 8           | 4          | 16         | >32         | >32              |
| 1987383                 | <i>A. baumannii</i> | 2019           | Georgia        | Respiratory: Endotracheal aspirate | 4    | >64              | >64         | 32          | >64         | 0.25       | >16         | 32         | >16        | 1           | 4                |
| 1975052                 | <i>A. baumannii</i> | 2019           | Israel         | Bodily Fluids: Thoracentesis       | 8    | 32               | >64         | >64         | >64         | 0.25       | 16          | 8          | >16        | >32         | >32              |



|                         |                     |                |               | MIC values (µg/mL)                  |      |                  |             |             |             |            |             |            |            |             |                  |
|-------------------------|---------------------|----------------|---------------|-------------------------------------|------|------------------|-------------|-------------|-------------|------------|-------------|------------|------------|-------------|------------------|
|                         |                     |                |               | CLSI Cut-off Values (µg/mL)         | N/A  | S≤4/8<br>R≥16/32 | S≤8<br>R≥32 | S≤8<br>R≥32 | S≤8<br>R≥64 | S≤2<br>R≥8 | S≤4<br>R≥16 | S≤2<br>R≥8 | S≤2<br>R≥8 | S≤4<br>R≥16 | S≤2/38<br>R≥4/76 |
| IHMA Clinical Isolate # | Organism            | Year Collected | Country       | Body Location                       | OMN6 | SAM (2:1)        | FEP         | CAZ         | CRO         | COL        | GEN         | LVX        | MEM        | TET         | TSX (1:19)       |
| 1996909                 | <i>A. baumannii</i> | 2019           | Kuwait        | Respiratory: Endotracheal aspirate  | 4    | 8                | 32          | >64         | >64         | 0.25       | 0.5         | 1          | 16         | >32         | 32               |
| 1975075                 | <i>A. baumannii</i> | 2019           | Israel        | Cardiovascular: Blood               | 4    | 4                | 2           | 2           | 16          | 0.25       | 0.25        | ≤0.12      | 0.12       | 2           | 0.12             |
| 1977081                 | <i>A. baumannii</i> | 2019           | Kuwait        | Respiratory: Sputum                 | 4    | 16               | 32          | 64          | >64         | 0.25       | 0.5         | 1          | >16        | >32         | 32               |
| 1969002                 | <i>A. baumannii</i> | 2019           | Israel        | Respiratory: Bronchoalveolar lavage | 4    | 64               | 32          | >64         | >64         | 0.25       | >16         | 8          | >16        | 8           | 1                |
| 2129362                 | <i>A. baumannii</i> | 2019           | Qatar         | Respiratory: Sputum                 | 4    | 2                | 2           | 4           | 32          | 0.25       | 0.25        | 8          | 0.5        | >32         | 8                |
| 2020247                 | <i>A. baumannii</i> | 2019           | Israel        | Respiratory: Endotracheal aspirate  | 4    | 4                | 4           | 4           | 16          | 0.25       | 0.5         | ≤0.12      | 0.5        | 1           | 0.25             |
| 2090519                 | <i>A. baumannii</i> | 2019           | United States | Respiratory: Sputum                 | 8    | ≤1               | 1           | 2           | 8           | 0.25       | 0.25        | ≤0.12      | ≤0.06      | 0.5         | 0.25             |
| 2014436                 | <i>A. baumannii</i> | 2019           | Jordan        | Cardiovascular: Blood               | 8    | >64              | >64         | >64         | >64         | 1          | 1           | 8          | >16        | 2           | 4                |
| 2000834                 | <i>A. baumannii</i> | 2019           | United States | Respiratory: Bronchoalveolar lavage | 4    | 2                | 8           | 4           | 16          | 0.25       | 2           | ≤0.12      | 0.25       | 1           | ≤0.06            |
| 2014387                 | <i>A. baumannii</i> | 2019           | Jordan        | Respiratory: Sputum                 | 8    | 32               | 64          | >64         | >64         | 0.5        | >16         | 32         | >16        | 8           | 2                |
| 2088276                 | <i>A. baumannii</i> | 2019           | United States | Respiratory: Sputum                 | 8    | 2                | 0.5         | 2           | 8           | 0.5        | 0.5         | ≤0.12      | 0.12       | >32         | 0.12             |
| 1975118                 | <i>A. baumannii</i> | 2019           | Israel        | Respiratory: Sputum                 | 4    | 2                | 2           | 4           | 16          | 0.25       | 0.25        | ≤0.12      | 0.25       | 1           | 0.12             |



|                         |                     |                |               | MIC values (µg/mL)                 |      |                  |             |             |             |            |             |            |            |             |                  |
|-------------------------|---------------------|----------------|---------------|------------------------------------|------|------------------|-------------|-------------|-------------|------------|-------------|------------|------------|-------------|------------------|
|                         |                     |                |               | CLSI Cut-off Values (µg/mL)        | N/A  | S≤4/8<br>R≥16/32 | S≤8<br>R≥32 | S≤8<br>R≥32 | S≤8<br>R≥64 | S≤2<br>R≥8 | S≤4<br>R≥16 | S≤2<br>R≥8 | S≤2<br>R≥8 | S≤4<br>R≥16 | S≤2/38<br>R≥4/76 |
| IHMA Clinical Isolate # | Organism            | Year Collected | Country       | Body Location                      | OMN6 | SAM (2:1)        | FEP         | CAZ         | CRO         | COL        | GEN         | LVX        | MEM        | TET         | TSX (1:19)       |
| 1977086                 | <i>A. baumannii</i> | 2019           | Kuwait        | Respiratory: Endotracheal aspirate | 4    | 32               | 32          | >64         | >64         | 0.25       | >16         | 8          | >16        | >32         | 1                |
| 1964755                 | <i>A. baumannii</i> | 2019           | United States | Bodily Fluids: Peritoneal          | 4    | 2                | 1           | 4           | 16          | ≤0.12      | 0.25        | ≤0.12      | 0.12       | 1           | 0.12             |
| 1975603                 | <i>A. baumannii</i> | 2019           | Israel        | Respiratory: Sputum                | 8    | 32               | 64          | >64         | >64         | 0.25       | >16         | 8          | >16        | >32         | 1                |
| 1996748                 | <i>A. baumannii</i> | 2019           | Kuwait        | Bodily Fluids: Abscess / Pus       | 4    | 16               | 32          | 64          | >64         | 0.25       | 0.5         | 2          | >16        | >32         | 32               |
| 2088411                 | <i>A. baumannii</i> | 2019           | United States | Respiratory: Endotracheal aspirate | 4    | 2                | 2           | 4           | 16          | ≤0.12      | 0.5         | ≤0.12      | 0.25       | 0.5         | 0.25             |
| 1975128                 | <i>A. baumannii</i> | 2019           | Israel        | Respiratory: Sputum                | 4    | 16               | 32          | 64          | >64         | 0.25       | >16         | 2          | >16        | 2           | 32               |
| 2020244                 | <i>A. baumannii</i> | 2019           | Israel        | Respiratory: Endotracheal aspirate | 8    | 16               | 64          | 16          | 32          | 0.25       | ≤0.12       | 8          | 16         | 1           | 0.5              |
| 1996742                 | <i>A. baumannii</i> | 2019           | Kuwait        | Genitourinary: Urine               | 4    | 8                | 16          | 32          | >64         | 0.25       | 0.5         | 2          | 8          | >32         | >32              |
| 1998890                 | <i>A. baumannii</i> | 2019           | United States | Respiratory: Sputum                | 4    | 8                | 4           | 32          | >64         | 0.25       | 1           | 16         | 8          | >32         | 0.25             |
| 1963202                 | <i>A. baumannii</i> | 2019           | Israel        | Respiratory: Sputum                | 4    | 2                | 2           | 4           | 8           | 0.25       | 0.25        | ≤0.12      | 0.12       | 0.5         | 0.12             |
| 2046028                 | <i>A. baumannii</i> | 2019           | Lebanon       | Genitourinary: Urine               | 8    | 64               | 64          | >64         | >64         | 0.5        | >16         | 8          | >16        | 8           | 1                |
| 2020257                 | <i>A. baumannii</i> | 2019           | Israel        | Respiratory: Endotracheal aspirate | 4    | 64               | >64         | >64         | >64         | 0.25       | >16         | 0.5        | 4          | 1           | >32              |



|                         |                     |                |               | MIC values (µg/mL)                 |      |                  |             |             |             |            |             |            |            |             |                  |
|-------------------------|---------------------|----------------|---------------|------------------------------------|------|------------------|-------------|-------------|-------------|------------|-------------|------------|------------|-------------|------------------|
|                         |                     |                |               | CLSI Cut-off Values (µg/mL)        | N/A  | S≤4/8<br>R≥16/32 | S≤8<br>R≥32 | S≤8<br>R≥32 | S≤8<br>R≥64 | S≤2<br>R≥8 | S≤4<br>R≥16 | S≤2<br>R≥8 | S≤2<br>R≥8 | S≤4<br>R≥16 | S≤2/38<br>R≥4/76 |
| IHMA Clinical Isolate # | Organism            | Year Collected | Country       | Body Location                      | OMN6 | SAM (2:1)        | FEP         | CAZ         | CRO         | COL        | GEN         | LVX        | MEM        | TET         | TSX (1:19)       |
| 1992307                 | <i>A. baumannii</i> | 2019           | United States | Respiratory: Endotracheal aspirate | 4    | 2                | 2           | 4           | 16          | ≤0.12      | 0.5         | ≤0.12      | 2          | 0.5         | ≤0.06            |
| 1963174                 | <i>A. baumannii</i> | 2019           | Israel        | Respiratory: Sputum                | 4    | 4                | 8           | 64          | >64         | ≤0.12      | 0.5         | 4          | 0.5        | 4           | 8                |
| 2129302                 | <i>A. baumannii</i> | 2019           | Qatar         | Respiratory: Sputum                | 4    | 16               | 32          | >64         | >64         | ≤0.12      | >16         | 4          | 16         | >32         | ≤0.06            |
| 1969045                 | <i>A. baumannii</i> | 2019           | Israel        | Respiratory: Sputum                | 4    | 16               | 16          | 64          | >64         | 0.25       | >16         | 8          | >16        | >32         | >32              |
| 2082231                 | <i>A. baumannii</i> | 2019           | United States | Respiratory: Endotracheal aspirate | 4    | ≤1               | 0.5         | 1           | 4           | 0.25       | 0.25        | ≤0.12      | ≤0.06      | 0.25        | 0.12             |
| 2082762                 | <i>A. baumannii</i> | 2019           | United States | Respiratory: Lungs                 | 4    | 32               | 32          | 64          | >64         | ≤0.12      | >16         | 4          | >16        | >32         | 32               |
| 1957872                 | <i>A. baumannii</i> | 2019           | Israel        | Respiratory: Bronchials            | 4    | 16               | 64          | >64         | >64         | 0.25       | 16          | 4          | 16         | >32         | >32              |
| 1975714                 | <i>A. baumannii</i> | 2019           | Israel        | Bodily Fluids: Peritoneal          | 4    | 4                | 8           | >64         | >64         | ≤0.12      | 1           | 2          | 0.5        | 4           | 8                |
| 2082184                 | <i>A. baumannii</i> | 2019           | United States | Respiratory: Endotracheal aspirate | 4    | ≤1               | 0.5         | 2           | 8           | 0.25       | 0.5         | ≤0.12      | 0.12       | 0.25        | 0.12             |
| 2020240                 | <i>A. baumannii</i> | 2019           | Israel        | Respiratory: Endotracheal aspirate | 4    | 2                | 2           | 8           | 16          | 0.25       | 0.5         | ≤0.12      | 0.12       | 0.5         | ≤0.06            |
| 2090615                 | <i>A. baumannii</i> | 2019           | United States | Respiratory: Sputum                | 4    | 16               | 32          | 32          | >64         | 0.25       | 0.5         | 8          | 16         | >32         | 32               |
| 2020248                 | <i>A. baumannii</i> | 2019           | Israel        | Respiratory: Sputum                | 8    | 4                | 8           | 16          | >64         | 0.25       | >16         | 0.5        | 1          | >32         | 4                |



|                         |                     |                |               | MIC values (µg/mL)                  |      |                  |             |             |             |            |             |            |            |             |                  |
|-------------------------|---------------------|----------------|---------------|-------------------------------------|------|------------------|-------------|-------------|-------------|------------|-------------|------------|------------|-------------|------------------|
|                         |                     |                |               | CLSI Cut-off Values (µg/mL)         | N/A  | S≤4/8<br>R≥16/32 | S≤8<br>R≥32 | S≤8<br>R≥32 | S≤8<br>R≥64 | S≤2<br>R≥8 | S≤4<br>R≥16 | S≤2<br>R≥8 | S≤2<br>R≥8 | S≤4<br>R≥16 | S≤2/38<br>R≥4/76 |
| IHMA Clinical Isolate # | Organism            | Year Collected | Country       | Body Location                       | OMN6 | SAM (2:1)        | FEP         | CAZ         | CRO         | COL        | GEN         | LVX        | MEM        | TET         | TSX (1:19)       |
| 2026189                 | <i>A. baumannii</i> | 2019           | Australia     | Genitourinary: Urine                | 4    | ≤1               | 0.5         | 1           | 8           | ≤0.12      | 1           | ≤0.12      | ≤0.06      | 0.25        | 0.12             |
| 2014437                 | <i>A. baumannii</i> | 2019           | Jordan        | Respiratory: Sputum                 | 8    | 32               | >64         | 64          | >64         | 0.5        | >16         | 16         | >16        | 8           | >32              |
| 2019036                 | <i>A. baumannii</i> | 2019           | United States | Respiratory: Sputum                 | 8    | 16               | 32          | 64          | >64         | 0.25       | >16         | 2          | >16        | >32         | 32               |
| 1968943                 | <i>A. baumannii</i> | 2019           | Israel        | Cardiovascular: Blood               | 4    | 64               | >64         | >64         | >64         | 0.25       | 2           | 4          | >16        | >32         | 0.5              |
| 1990668                 | <i>A. baumannii</i> | 2019           | Philippines   | Bodily Fluids: Peritoneal           | 4    | 64               | >64         | >64         | >64         | 0.25       | >16         | 32         | >16        | 4           | 32               |
| 1977074                 | <i>A. baumannii</i> | 2019           | Kuwait        | Genitourinary: Urine                | 4    | 8                | 64          | >64         | >64         | 0.25       | >16         | 2          | 0.25       | >32         | ≤0.06            |
| 2020254                 | <i>A. baumannii</i> | 2019           | Israel        | Respiratory: Endotracheal aspirate  | 4    | 2                | 2           | 4           | 16          | ≤0.12      | 0.5         | ≤0.12      | 0.25       | 1           | 0.25             |
| 2088269                 | <i>A. baumannii</i> | 2019           | United States | Respiratory: Bronchoalveolar lavage | 8    | 2                | 2           | 4           | 16          | 0.25       | 1           | ≤0.12      | 0.12       | 0.5         | 0.25             |
| 2004158                 | <i>A. baumannii</i> | 2019           | Philippines   | Respiratory: Endotracheal aspirate  | 4    | 64               | >64         | >64         | >64         | 0.25       | >16         | 16         | >16        | 4           | 32               |
| 1996891                 | <i>A. baumannii</i> | 2019           | Kuwait        | Respiratory: Endotracheal aspirate  | 4    | 64               | 64          | >64         | >64         | 0.5        | >16         | 2          | >16        | >32         | 16               |
| 2020255                 | <i>A. baumannii</i> | 2019           | Israel        | Respiratory: Endotracheal aspirate  | 4    | 2                | 1           | 2           | 16          | 0.25       | 0.5         | ≤0.12      | 0.12       | 0.25        | ≤0.06            |
| 2053338                 | <i>A. baumannii</i> | 2019           | United States | Respiratory: Sputum                 | 8    | 32               | 16          | >64         | >64         | 0.25       | >16         | 4          | >16        | >32         | 8                |



|                         |                     |                |               | MIC values (µg/mL)                 |      |                  |             |             |             |            |             |            |            |             |                  |
|-------------------------|---------------------|----------------|---------------|------------------------------------|------|------------------|-------------|-------------|-------------|------------|-------------|------------|------------|-------------|------------------|
|                         |                     |                |               | CLSI Cut-off Values (µg/mL)        | N/A  | S≤4/8<br>R≥16/32 | S≤8<br>R≥32 | S≤8<br>R≥32 | S≤8<br>R≥64 | S≤2<br>R≥8 | S≤4<br>R≥16 | S≤2<br>R≥8 | S≤2<br>R≥8 | S≤4<br>R≥16 | S≤2/38<br>R≥4/76 |
| IHMA Clinical Isolate # | Organism            | Year Collected | Country       | Body Location                      | OMN6 | SAM (2:1)        | FEP         | CAZ         | CRO         | COL        | GEN         | LVX        | MEM        | TET         | TSX (1:19)       |
| 1984887                 | <i>A. baumannii</i> | 2019           | Philippines   | Respiratory: Sputum                | 4    | 64               | 64          | >64         | >64         | 0.25       | 1           | 16         | >16        | 4           | >32              |
| 2014441                 | <i>A. baumannii</i> | 2019           | Jordan        | Respiratory: Sputum                | 4    | 8                | 8           | 16          | >64         | 4          | >16         | >32        | 16         | >32         | 32               |
| 1996925                 | <i>A. baumannii</i> | 2019           | Kuwait        | Respiratory: Endotracheal aspirate | 4    | 16               | 32          | 32          | >64         | 0.25       | 0.25        | 2          | >16        | >32         | 32               |
| 1963468                 | <i>A. baumannii</i> | 2019           | United States | Bodily Fluids: Peritoneal          | 4    | 2                | 1           | 4           | 16          | ≤0.12      | ≤0.12       | ≤0.12      | 0.12       | 0.5         | 0.12             |
| 1976951                 | <i>A. baumannii</i> | 2019           | Kuwait        | Bodily Fluids: Abscess / Pus       | 4    | 8                | 16          | 32          | >64         | 0.25       | 0.5         | 2          | 16         | >32         | 32               |
| 1996809                 | <i>A. baumannii</i> | 2019           | Kuwait        | Cardiovascular: Blood              | 4    | 64               | 64          | >64         | >64         | 1          | >16         | 2          | >16        | >32         | 16               |
| 2082626                 | <i>A. baumannii</i> | 2019           | United States | Respiratory: Sputum                | 8    | 8                | 16          | >64         | >64         | 0.25       | >16         | 8          | >16        | 4           | 8                |
| 1977085                 | <i>A. baumannii</i> | 2019           | Kuwait        | Gastrointestinal: Rectum           | 4    | 8                | 16          | 64          | >64         | 0.25       | 0.5         | 2          | 16         | >32         | 16               |
| 1996863                 | <i>A. baumannii</i> | 2019           | Kuwait        | Respiratory: Endotracheal aspirate | 4    | 32               | 64          | 64          | >64         | 0.25       | 0.25        | 2          | >16        | >32         | 16               |
| 1992310                 | <i>A. baumannii</i> | 2019           | United States | Genitourinary: Urine               | 4    | ≤1               | 16          | 8           | 16          | ≤0.12      | 0.25        | 0.25       | 0.12       | 0.5         | ≤0.06            |
| 2129359                 | <i>A. baumannii</i> | 2019           | Qatar         | Respiratory: Sputum                | 4    | ≤1               | 0.5         | 1           | 4           | 0.25       | 0.25        | ≤0.12      | ≤0.06      | 0.25        | 0.12             |
| 2036956                 | <i>A. baumannii</i> | 2019           | Lebanon       | Genitourinary: Urine               | 4    | 32               | 64          | >64         | >64         | 0.25       | >16         | 8          | >16        | >32         | 32               |
| 2088470                 | <i>A. baumannii</i> | 2019           | United States | Respiratory: Sputum                | 8    | 16               | 32          | >64         | >64         | 0.25       | 2           | 8          | 16         | 1           | 0.12             |



|                         |                     |                |               | MIC values (µg/mL)                  |      |                  |             |             |             |            |             |            |            |             |                  |
|-------------------------|---------------------|----------------|---------------|-------------------------------------|------|------------------|-------------|-------------|-------------|------------|-------------|------------|------------|-------------|------------------|
|                         |                     |                |               | CLSI Cut-off Values (µg/mL)         | N/A  | S≤4/8<br>R≥16/32 | S≤8<br>R≥32 | S≤8<br>R≥32 | S≤8<br>R≥64 | S≤2<br>R≥8 | S≤4<br>R≥16 | S≤2<br>R≥8 | S≤2<br>R≥8 | S≤4<br>R≥16 | S≤2/38<br>R≥4/76 |
| IHMA Clinical Isolate # | Organism            | Year Collected | Country       | Body Location                       | OMN6 | SAM (2:1)        | FEP         | CAZ         | CRO         | COL        | GEN         | LVX        | MEM        | TET         | TSX (1:19)       |
| 2129256                 | <i>A. baumannii</i> | 2019           | Qatar         | Bodily Fluids: Peritoneal           | 4    | ≤1               | 1           | 2           | 8           | 0.25       | 0.25        | ≤0.12      | ≤0.06      | 0.25        | ≤0.06            |
| 2090509                 | <i>A. baumannii</i> | 2019           | United States | Respiratory: Bronchoalveolar lavage | 8    | >64              | 32          | 32          | >64         | 0.25       | >16         | 16         | >16        | >32         | >32              |
| 2084306                 | <i>A. baumannii</i> | 2019           | United States | Respiratory: Sputum                 | 8    | 8                | 16          | 32          | >64         | 0.25       | >16         | 4          | 4          | >32         | >32              |
| 2115382                 | <i>A. baumannii</i> | 2019           | United States | Genitourinary: Urine                | 4    | 2                | 2           | 4           | 16          | 0.25       | 0.5         | ≤0.12      | 0.25       | 0.5         | 0.12             |
| 2041470                 | <i>A. baumannii</i> | 2019           | United States | Respiratory: Endotracheal aspirate  | 4    | 32               | 64          | >64         | >64         | 0.25       | >16         | 8          | >16        | >32         | 32               |
| 2020680                 | <i>A. baumannii</i> | 2019           | Australia     | Genitourinary: Urine                | 4    | ≤1               | 1           | 1           | 16          | 0.25       | 1           | ≤0.12      | 0.12       | 0.25        | ≤0.06            |
| 2024881                 | <i>A. baumannii</i> | 2019           | United States | Respiratory: Other                  | 4    | 32               | 16          | 64          | >64         | 0.25       | >16         | 4          | >16        | >32         | 32               |
| 2092806                 | <i>A. baumannii</i> | 2019           | United States | Genitourinary: Urine                | 4    | 2                | 1           | 4           | 16          | 0.25       | 0.5         | ≤0.12      | ≤0.06      | 0.25        | 0.12             |
| 1984493                 | <i>A. baumannii</i> | 2019           | Australia     | Respiratory: Sputum                 | 4    | 2                | 1           | 4           | 16          | 0.25       | 0.5         | ≤0.12      | 0.12       | 0.25        | 0.25             |
| 2090612                 | <i>A. baumannii</i> | 2019           | United States | Respiratory: Bronchoalveolar lavage | 4    | 64               | 32          | 32          | >64         | 0.25       | >16         | 16         | >16        | >32         | >32              |
| 2019219                 | <i>A. baumannii</i> | 2019           | United States | Respiratory: Endotracheal aspirate  | 4    | 8                | 16          | >64         | >64         | 0.25       | 4           | 32         | >16        | 4           | 8                |
| 1986328                 | <i>A. baumannii</i> | 2019           | United States | Genitourinary: Urine                | 4    | 2                | 1           | 2           | 8           | 0.25       | 0.5         | ≤0.12      | ≤0.06      | 0.25        | 0.12             |



|                         |                     |                |               | MIC values (µg/mL)                     |      |                  |             |             |             |            |             |            |            |             |                  |
|-------------------------|---------------------|----------------|---------------|----------------------------------------|------|------------------|-------------|-------------|-------------|------------|-------------|------------|------------|-------------|------------------|
|                         |                     |                |               | CLSI Cut-off Values (µg/mL)            | N/A  | S≤4/8<br>R≥16/32 | S≤8<br>R≥32 | S≤8<br>R≥32 | S≤8<br>R≥64 | S≤2<br>R≥8 | S≤4<br>R≥16 | S≤2<br>R≥8 | S≤2<br>R≥8 | S≤4<br>R≥16 | S≤2/38<br>R≥4/76 |
| IHMA Clinical Isolate # | Organism            | Year Collected | Country       | Body Location                          | OMN6 | SAM (2:1)        | FEP         | CAZ         | CRO         | COL        | GEN         | LVX        | MEM        | TET         | TSX (1:19)       |
| 2092731                 | <i>A. baumannii</i> | 2019           | United States | Respiratory:<br>Other                  | 4    | 16               | 32          | >64         | >64         | 0.25       | >16         | 16         | >16        | 4           | >32              |
| 2004640                 | <i>A. baumannii</i> | 2019           | United States | Respiratory:<br>Sputum                 | 4    | 2                | 1           | 2           | 8           | ≤0.12      | 0.25        | ≤0.12      | ≤0.06      | 0.25        | ≤0.06            |
| 2000832                 | <i>A. baumannii</i> | 2019           | United States | Respiratory:<br>Bronchoalveolar lavage | 4    | 2                | 2           | 2           | 16          | 0.25       | 0.25        | ≤0.12      | 0.12       | 0.5         | 0.25             |
| 2043615                 | <i>A. baumannii</i> | 2019           | United States | Genitourinary:<br>Urine                | 4    | 4                | 32          | >64         | >64         | 0.25       | >16         | 16         | >16        | 4           | >32              |
| 2088270                 | <i>A. baumannii</i> | 2019           | United States | Respiratory:<br>Bronchoalveolar lavage | 4    | ≤1               | 8           | 4           | 8           | 0.25       | >16         | ≤0.12      | 0.25       | 0.5         | 0.12             |
| 2092807                 | <i>A. baumannii</i> | 2019           | United States | Respiratory:<br>Endotracheal aspirate  | 4    | 32               | 32          | >64         | >64         | 0.25       | 0.5         | 16         | >16        | 2           | 0.5              |
| 2082625                 | <i>A. baumannii</i> | 2019           | United States | Respiratory:<br>Endotracheal aspirate  | 8    | 64               | 8           | 32          | >64         | 0.25       | >16         | 4          | 1          | >32         | >32              |
| 2111440                 | <i>A. baumannii</i> | 2019           | United States | Genitourinary:<br>Urine                | 4    | 16               | 16          | 64          | >64         | ≤0.12      | >16         | 2          | >16        | >32         | >32              |
| 2084326                 | <i>A. baumannii</i> | 2019           | United States | Respiratory:<br>Sputum                 | 4    | 8                | 16          | 32          | >64         | 0.25       | >16         | 4          | 4          | >32         | >32              |
| 2053330                 | <i>A. baumannii</i> | 2019           | United States | Respiratory:<br>Bronchoalveolar lavage | 8    | 32               | 32          | >64         | >64         | 0.25       | >16         | 2          | >16        | >32         | 0.25             |
| 2084337                 | <i>A. baumannii</i> | 2019           | United States | Respiratory:<br>Endotracheal aspirate  | 8    | 8                | 16          | >64         | >64         | 1          | 0.25        | 32         | 16         | 8           | 0.5              |



|                         |                     |                |               | MIC values (µg/mL)                 |      |                  |             |             |             |            |             |            |            |             |                  |
|-------------------------|---------------------|----------------|---------------|------------------------------------|------|------------------|-------------|-------------|-------------|------------|-------------|------------|------------|-------------|------------------|
|                         |                     |                |               | CLSI Cut-off Values (µg/mL)        | N/A  | S≤4/8<br>R≥16/32 | S≤8<br>R≥32 | S≤8<br>R≥32 | S≤8<br>R≥64 | S≤2<br>R≥8 | S≤4<br>R≥16 | S≤2<br>R≥8 | S≤2<br>R≥8 | S≤4<br>R≥16 | S≤2/38<br>R≥4/76 |
| IHMA Clinical Isolate # | Organism            | Year Collected | Country       | Body Location                      | OMN6 | SAM (2:1)        | FEP         | CAZ         | CRO         | COL        | GEN         | LVX        | MEM        | TET         | TSX (1:19)       |
| 2082025                 | <i>A. baumannii</i> | 2019           | United States | Genitourinary: Urine               | 4    | 2                | >64         | >64         | 64          | ≤0.12      | 0.25        | 2          | 0.5        | >32         | 0.5              |
| 1988902                 | <i>A. baumannii</i> | 2019           | United States | Respiratory: Sputum                | 4    | 4                | >64         | >64         | >64         | 0.25       | >16         | 16         | >16        | 8           | >32              |
| 2088463                 | <i>A. baumannii</i> | 2019           | United States | Respiratory: Sputum                | 4    | ≤1               | 1           | 1           | 4           | 0.25       | 0.5         | ≤0.12      | ≤0.06      | 0.25        | 0.12             |
| 2020647                 | <i>A. baumannii</i> | 2019           | Australia     | Bodily Fluids: Peritoneal          | 4    | 2                | 1           | 2           | 8           | ≤0.12      | 0.25        | ≤0.12      | 0.12       | 0.5         | ≤0.06            |
| 1988057                 | <i>A. baumannii</i> | 2019           | United States | Respiratory: Sputum                | 4    | 8                | 16          | 32          | >64         | 0.25       | >16         | 4          | 8          | >32         | >32              |
| 1984885                 | <i>A. baumannii</i> | 2019           | Philippines   | Respiratory: Endotracheal aspirate | 8    | 32               | 64          | >64         | >64         | 0.25       | >16         | 16         | >16        | 4           | 32               |
| 2115543                 | <i>A. baumannii</i> | 2019           | United States | Genitourinary: Urine               | 4    | ≤1               | 1           | 2           | 8           | ≤0.12      | 0.5         | ≤0.12      | ≤0.06      | 0.5         | 0.12             |
| 1984888                 | <i>A. baumannii</i> | 2019           | Philippines   | Respiratory: Endotracheal aspirate | 4    | 4                | 4           | 4           | 32          | 0.25       | 0.5         | ≤0.12      | 0.25       | 1           | 0.12             |
| 1988946                 | <i>A. baumannii</i> | 2019           | United States | Respiratory: Sputum                | 8    | 16               | 16          | 64          | >64         | 0.25       | >16         | 8          | >16        | >32         | >32              |
| 2104368                 | <i>A. baumannii</i> | 2019           | Australia     | Genitourinary: Urine               | 4    | ≤1               | ≤0.25       | ≤0.25       | 1           | ≤0.12      | 0.25        | ≤0.12      | ≤0.06      | ≤0.12       | ≤0.06            |
| 2142427                 | <i>A. baumannii</i> | 2019           | Australia     | Bodily Fluids: Peritoneal          | 4    | ≤1               | ≤0.25       | 0.5         | 4           | ≤0.12      | 0.5         | ≤0.12      | ≤0.06      | 0.5         | 0.12             |
| 2104351                 | <i>A. baumannii</i> | 2019           | Australia     | Genitourinary: Urine               | 4    | 2                | 2           | 4           | 16          | 0.25       | 0.5         | ≤0.12      | 0.12       | 0.5         | 0.12             |



**Table S2. MIC distribution against 401 clinical isolates tested for OMN6 and other antibiotics.** Bacteria were subjected to MIC tests with the broth microdilution method by IHMA Europe Sàrl, following the principles outlined in the CLSI guidelines.

| Clinical isolates numbers per MIC value (µg/mL) |       |       |      |       |      |     |    |    |    |     |     |    |    |     |    |     |    |     |
|-------------------------------------------------|-------|-------|------|-------|------|-----|----|----|----|-----|-----|----|----|-----|----|-----|----|-----|
| Drug                                            | ≤0.06 | ≤0.12 | 0.12 | ≤0.25 | 0.25 | 0.5 | ≤1 | 1  | 2  | 4   | 8   | >8 | 16 | >16 | 32 | >32 | 64 | >64 |
| OMN6                                            |       |       |      |       |      |     |    |    |    | 288 | 113 |    |    |     |    |     |    |     |
| SAM (2:1)                                       |       |       |      |       |      |     | 43 |    | 49 | 25  | 40  |    | 63 |     | 85 |     | 71 | 25  |
| FEP                                             |       |       |      | 6     |      | 15  |    | 42 | 27 | 15  | 27  |    | 50 |     | 84 |     | 82 | 53  |
| CAZ                                             |       |       |      | 1     |      | 2   |    | 20 | 40 | 43  | 5   |    | 16 |     | 31 |     | 50 | 193 |
| CRO                                             |       |       |      |       |      |     |    | 2  | 7  | 11  | 41  |    | 42 |     | 7  |     | 3  | 288 |
| COL                                             |       | 53    |      |       | 287  | 28  |    | 15 | 7  | 2   | 1   | 8  |    |     |    |     |    |     |
| GEN                                             |       | 5     |      |       | 50   | 75  |    | 18 | 14 | 6   | 5   |    | 10 | 218 |    |     |    |     |
| LVX                                             |       | 101   |      |       | 1    | 3   |    | 9  | 64 | 64  | 82  |    | 39 |     | 23 | 15  |    |     |
| MEM                                             | 36    |       | 44   |       | 18   | 13  |    | 5  | 4  | 6   | 16  |    | 58 | 201 |    |     |    |     |
| TET                                             |       | 3     |      |       | 37   | 57  |    | 34 | 26 | 32  | 13  |    | 2  |     | 3  | 194 |    |     |
| SXT (1:19)                                      | 36    |       | 67   |       | 18   | 19  |    | 33 | 15 | 20  | 24  |    | 17 |     | 61 | 91  |    |     |



**Table S3. Supplementary information about the *A. baumannii-calcoaceticus* species complex strains and clinical isolates tested in the serial passaging study presented in Figure 1 and the MIC study presented in Table 2.** The resistance phenotypes of the clinical isolates were characterized by JMI Laboratories (North Liberty, IA, USA) using the broth microdilution method following the principles outlined in the CLSI guidelines. The resistance phenotypes were determined according to CLSI interpretive criteria for meropenem and EUCAST criteria for colistin. Abbreviations: Col-S, colistin-susceptible; Col-R, colistin-resistant; Mer-S, meropenem-susceptible; Mer-R, meropenem-resistant; ATCC, American Type Culture Collection; BPS, Bovine Pulmonary Surfactant; NCTC, National Collection of Type Cultures; N/A, not applicable.

| Collection No.              | Relevant phenotypes <sup>a</sup> | Continent     | Serial passaging study | BPS MIC study |
|-----------------------------|----------------------------------|---------------|------------------------|---------------|
| <b>ATCC 19606</b>           | Col-S Mer-S                      | N/A           | Yes                    |               |
| <b>NCTC 13304</b>           | Col-S Mer-R                      | N/A           | Yes                    |               |
| <b>1092865 <sup>b</sup></b> | Col-S Mer-S                      | Europe        |                        | Yes           |
| <b>1094885 <sup>b</sup></b> | Col-S Mer-S                      | North America | Yes                    | Yes           |
| <b>1095725 <sup>b</sup></b> | Col-S Mer-R                      | North America |                        | Yes           |
| <b>1096848 <sup>b</sup></b> | Col-S Mer-R                      | Europe        | Yes                    | Yes           |
| <b>1098733 <sup>b</sup></b> | Col-S Mer-S                      | Europe        |                        | Yes           |
| <b>1111408 <sup>b</sup></b> | Col-R Mer-S                      | North America |                        | Yes           |
| <b>1111669 <sup>b</sup></b> | Col-R Mer-R                      | North America |                        | Yes           |
| <b>1115893 <sup>b</sup></b> | Col-R Mer-S                      | North America |                        | Yes           |
| <b>1115918 <sup>b</sup></b> | Col-S Mer-S                      | North America |                        | Yes           |
| <b>1128135 <sup>b</sup></b> | Col-R Mer-R                      | Europe        |                        | Yes           |

<sup>a</sup> EUCAST breakpoint interpretive criteria were used.

<sup>b</sup> Clinical isolate obtained from the 2019 JMI Laboratories SENTRY program.



**Table S4. Supplementary information about the resistance pattern of the bacterial strain *A. baumannii* BAA-1793 used in the mouse bacteremia survival model presented in Figure 2.** The antibiogram was determined by ATCC according to CLSI guidelines, and is presented in the next table according to the following abbreviations: *S* Susceptible, *I* intermediate, *R* resistant.

| Antibiotic name               | Resistance pattern | Antibiotic name                 | Resistance pattern |
|-------------------------------|--------------------|---------------------------------|--------------------|
| Amikacin                      | S                  | Ciprofloxacin                   | R                  |
| Amoxicillin / Clavulanic acid | R                  | Gentamicin                      | S                  |
| Ampicillin                    | R                  | Imipenem                        | R                  |
| Ampicillin/Sulbactam          | S                  | Levofloxacin                    | I                  |
| Aztreonam                     | R                  | Meropenem                       | R                  |
| Cefalotin                     | R                  | Moxifloxacin                    | R                  |
| Cefazolin                     | R                  | Nalidixic Acid                  | R                  |
| Cefepime                      | R                  | Nitrofurantoin                  | R                  |
| Cefotaxime                    | R                  | Norfloxacin                     | R                  |
| Cefotetan                     | R                  | Piperacillin                    | R                  |
| Cefoxitin                     | R                  | Piperacillin / Tazobactam       | R                  |
| Cefpodoxime                   | R                  | Tetracycline                    | R                  |
| Ceftazidime                   | R                  | Ticarcillin                     | R                  |
| Ceftizoxime                   | R                  | Ticarcillin / Clavulanic acid   | R                  |
| Ceftriaxone                   | R                  | Tigecycline                     | S                  |
| Cefuroxime                    | R                  | Tobramycin                      | R                  |
| Cefuroxime Axetil             | R                  | Trimethoprim / Sulfamethoxazole | S                  |



**Table S5. Supplementary information about the resistance pattern of the *A. baumannii* ACC000535 clinical isolate used in the chronic lung infection model presented in Figure 3 and in the time-course study presented in Figure 4.** The resistance pattern of the different bacterial isolates was characterized by broth microdilution studies for colistin, or with the VITEK 2 (BioMérieux SA, Marcy l'Etoile, France) system for the other antibiotics. The resistance range of each antibiotic has been determined according to CLSI guidelines, and is presented in the next table according to the following abbreviations: *S* Susceptible, *I* intermediate, *R* resistant, *MDR* multidrug resistant, *MIC* Minimal Inhibitory Concentration, *GEN* gentamycin, *AUG* amoxicillin/clavulanic acid, *IMP* imipenem, *CTX* cefotaxime, *CIP* ciprofloxacin, *PTZ* piperacillin/tazobactam, *CAZ* ceftazidime.

| Bacteria            | Strain    | Resistance pattern | Colistin MIC (µg/mL) | VITEK characterization |     |     |     |     |     |     |
|---------------------|-----------|--------------------|----------------------|------------------------|-----|-----|-----|-----|-----|-----|
|                     |           |                    |                      | GEN                    | AUG | IMP | CTX | CIP | PTZ | CAZ |
| <i>A. baumannii</i> | ACC 00535 | MDR                | 0.25                 | R                      | R   | I   | R   | R   | R   | R   |
